# Supplementary material for: A DFT and QTAIM study of the novel d-block metal complexes with tetraoxa[8]circulene-based ligands
Source: Royal Society of Chemistry journal article supplement (doi:10.1039/c5nj01255d), 2015-01-01
Supplement: c5nj01255d1.pdf [file c5nj01255d1.pdf]

# DFT and QTAIM study of the novel d-block metal complexes with tetraoxa[8]circulene-based ligand

Nataliya N. Karaush <sup>a</sup>, Gleb V. Baryshnikov<sup>a</sup>, Valentina A. Minaeva <sup>a</sup> and

Boris F. Minaev <sup>a, b</sup>

<sup>a</sup> Bohdan Khmelnytsky National University, Cherkassy, 18031, Ukraine. E-mail:

*karaush\_nataliya@rambler.ru, glebchem@rambler.ru, bfmin@rambler.ru*

<sup>b</sup> Tomsk State University, 634050, Tomsk, Russian Federation

## Electronic Supplementary Information

### List of Content

|                                                                                                            |          |
|------------------------------------------------------------------------------------------------------------|----------|
| Molecular HOMO-LUMO orbitals for the studied complexes <b>1–6</b> (Fig. <b>S1–S8</b> )                     | <b>2</b> |
| <b>Table S1.</b> Total energies of the studied complexes <b>1–6</b> with tetraoxa[8]circulene-based ligand | <b>6</b> |
| Optimized Cartesian coordinates of the complexes <b>1–6</b> (Tables <b>S2–S8</b> )                         | <b>7</b> |

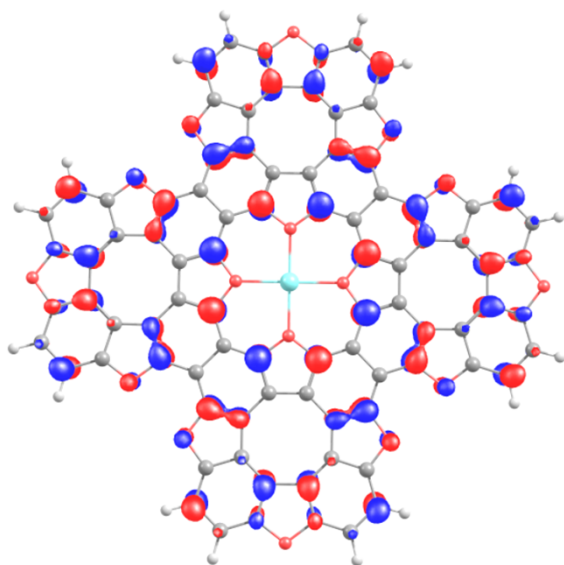

HOMO

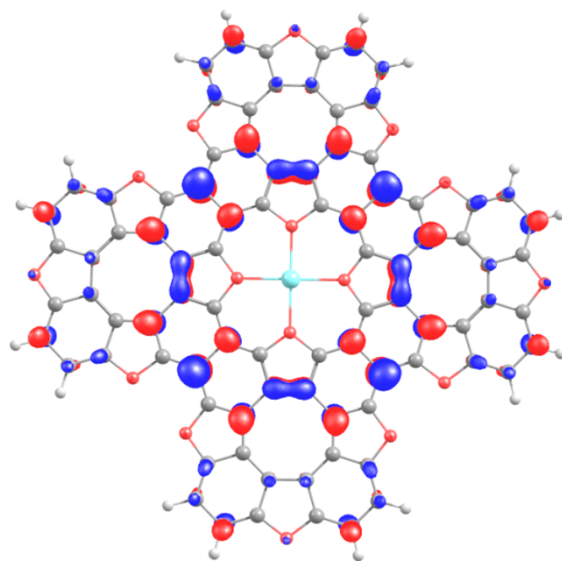

LUMO

**Fig. S1.** Molecular HOMO-LUMO orbitals for complex **1** calculated at the B3LYP/LanL2Dz level of theory

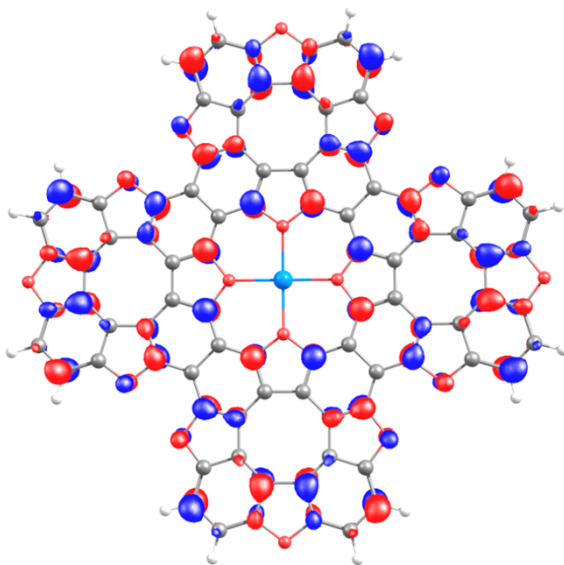

HOMO- $\alpha$  (350)

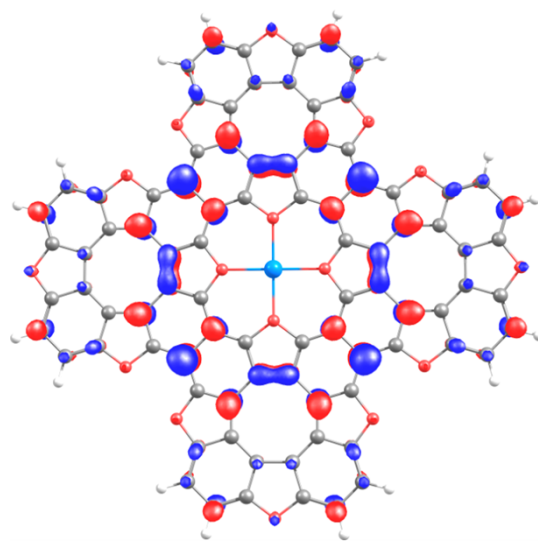

LUMO- $\alpha$  (351)

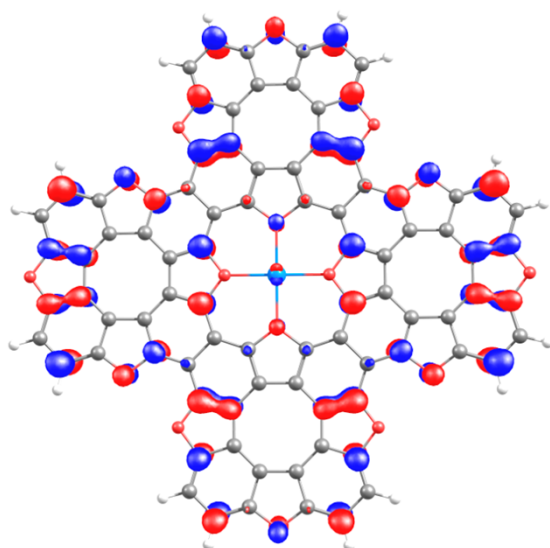

HOMO- $\beta$  (349)

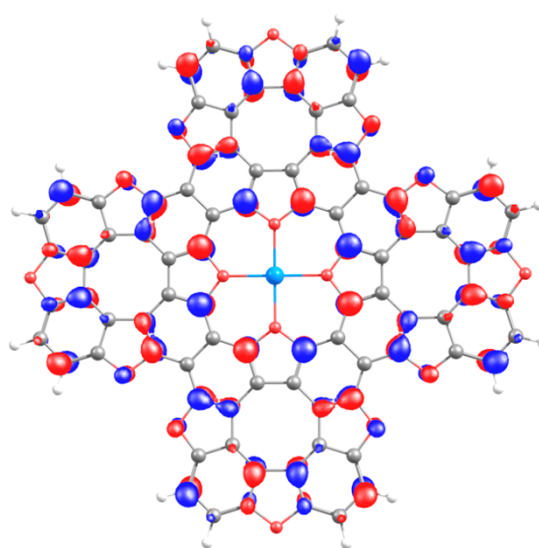

LUMO- $\beta$  (350)

**Fig. S2.** Molecular HOMO-LUMO orbitals for complex **2** calculated at the B3LYP/LanL2Dz level of theory

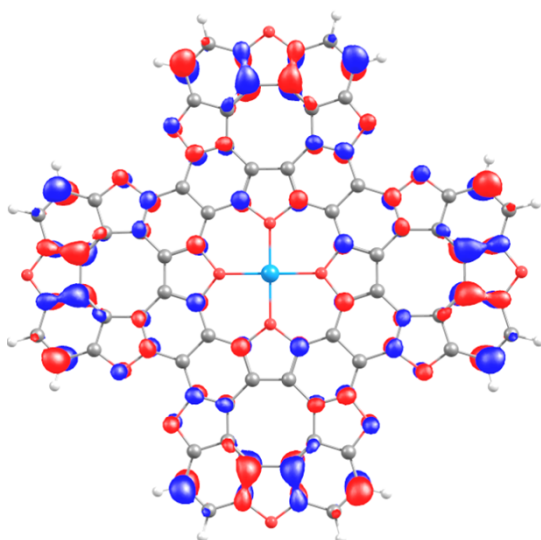

HOMO

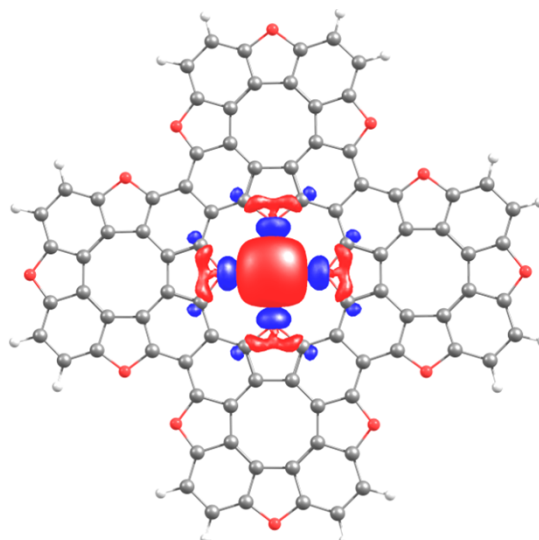

LUMO

**Fig. S3.** Molecular HOMO-LUMO orbitals for complex **3** in the ground singlet state calculated at the B3LYP/LanL2Dz level of theory

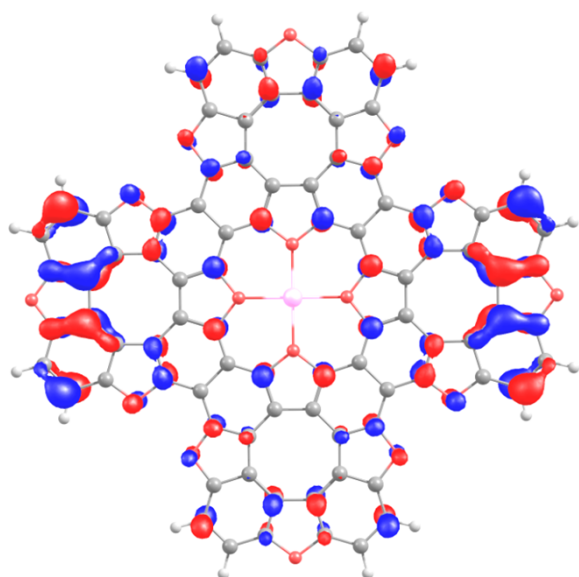

HOMO-348

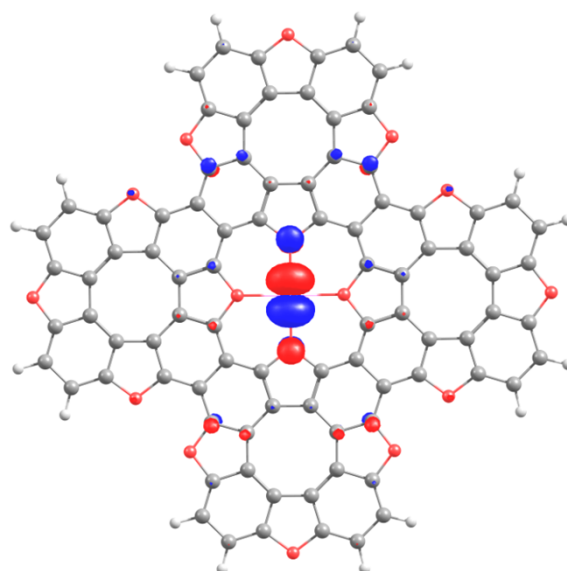

LUMO-349

**Fig. S4.** Molecular HOMO-LUMO orbitals for complex **4** in the excited singlet state calculated at the B3LYP/LanL2Dz level of theory

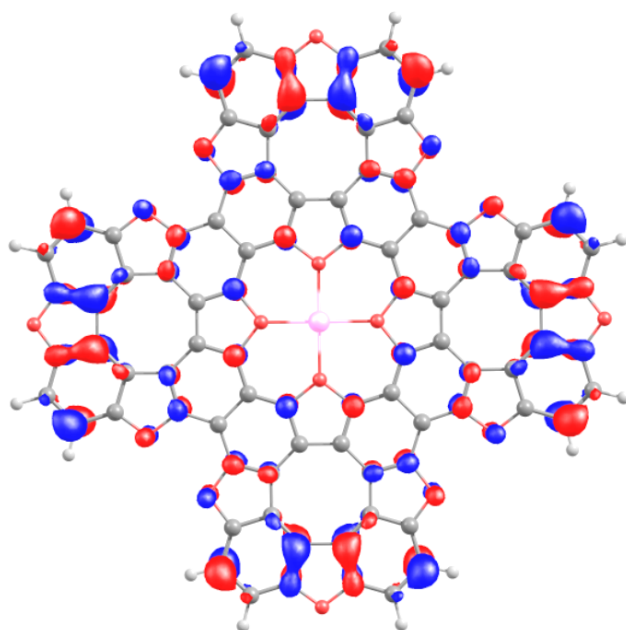

HOMO- $\alpha$  (349)

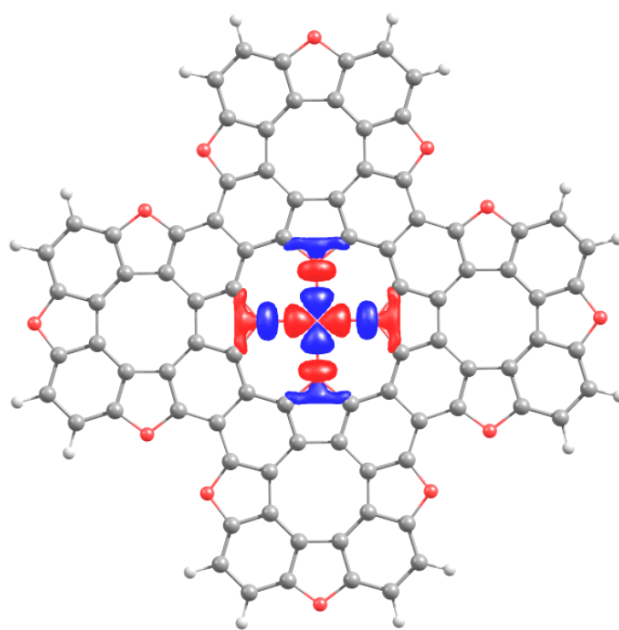

LUMO- $\alpha$  (350)

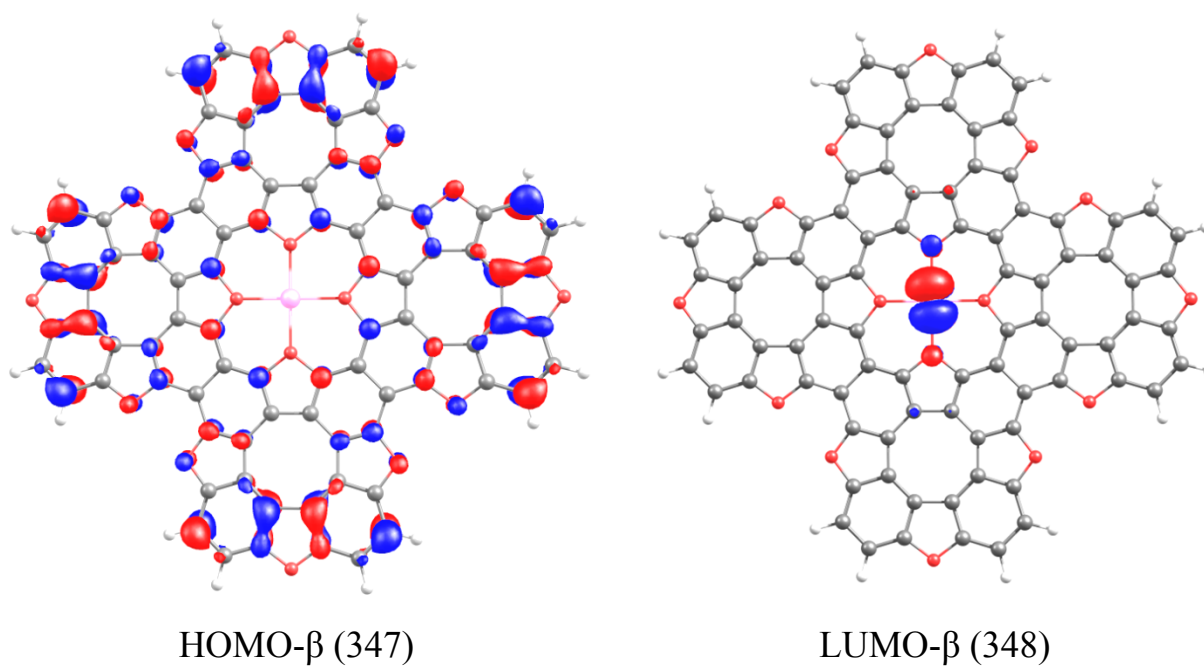

**Fig. S5.** Molecular HOMO-LUMO orbitals for complex **4** in the ground triplet state calculated at the B3LYP/LanL2Dz level of theory

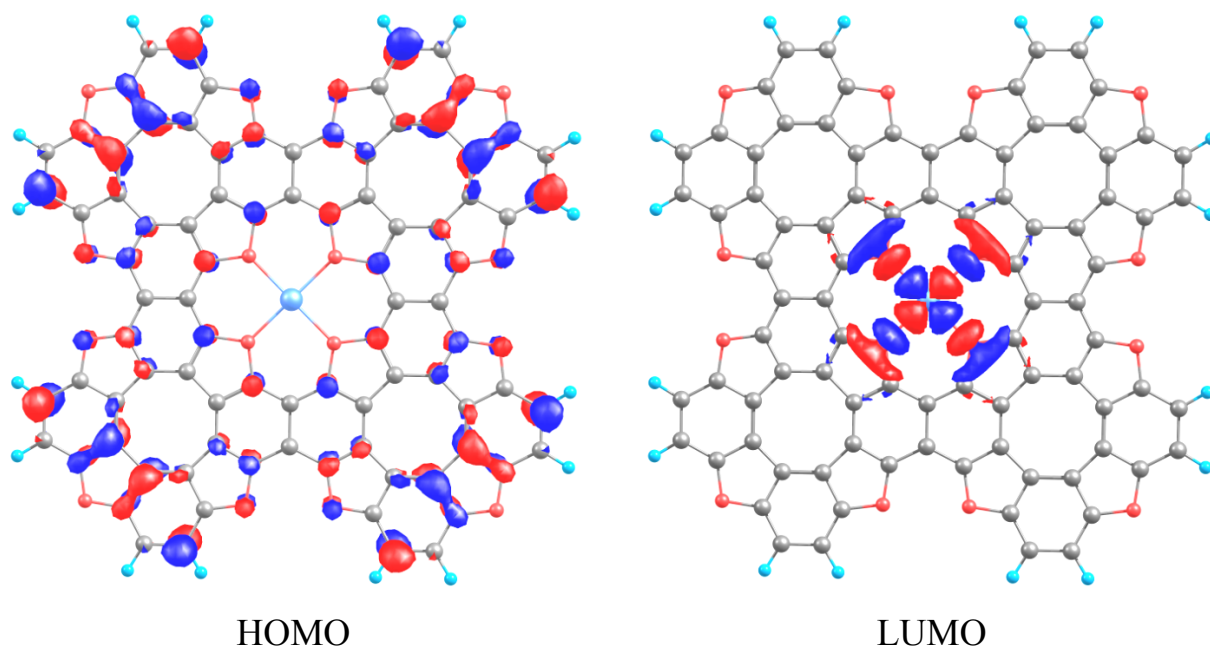

**Fig. S6.** Molecular HOMO-LUMO orbitals for complex **5** in the ground singlet state calculated at the B3LYP/LanL2Dz level of theory

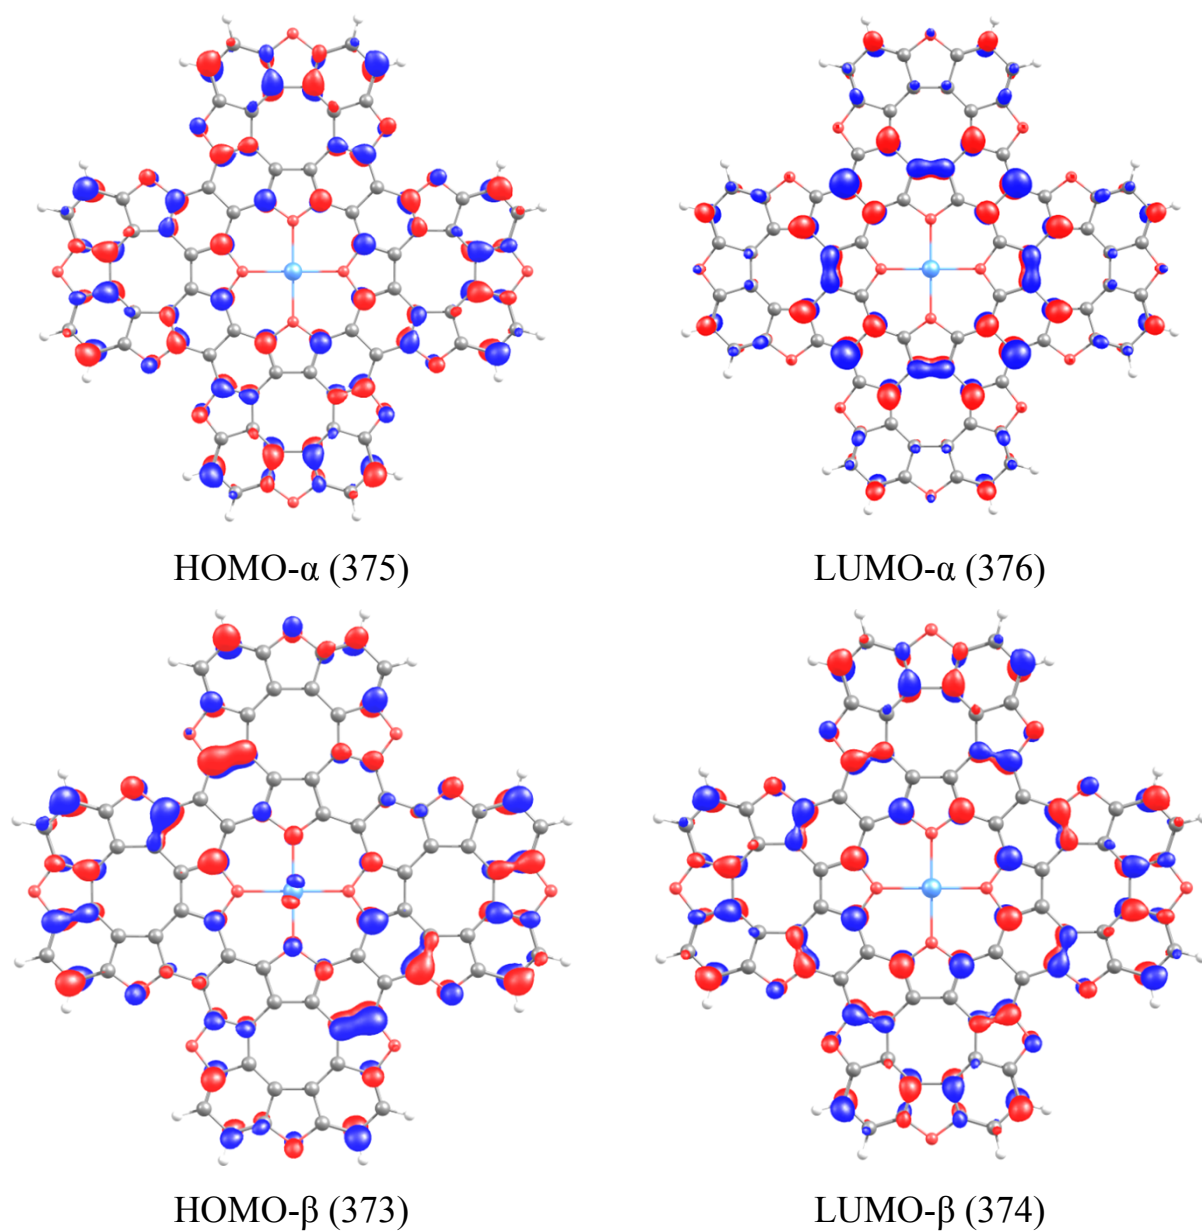

**Fig. S7.** Molecular HOMO-LUMO orbitals for complex **5** in the excited triplet state calculated at the B3LYP/LanL2Dz level of theory

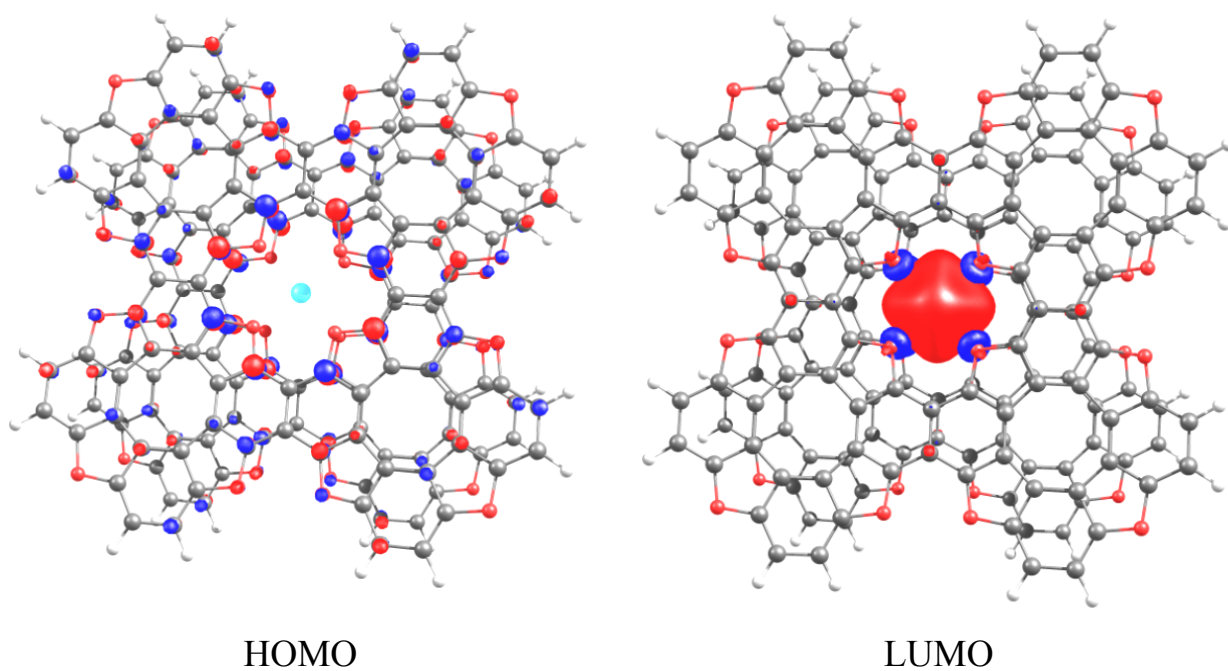

**Fig. S8.** Molecular HOMO-LUMO orbitals for complex **6** in the ground singlet state calculated at the B3LYP/LanL2Dz level of theory

**Table S1.** Total energies of the studied transition metal complexes **1–7** with tetraoxa[8]circulene-based ligand calculated at the B3LYP/LanL2Dz level of theory

| Complex  | Metal-ion        | S   | $E_{tot}, a.u.$ |
|----------|------------------|-----|-----------------|
| <b>1</b> | Cu <sup>1+</sup> | 0   | -4762.0582      |
| <b>2</b> | Cu <sup>2+</sup> | 1/2 | -4761.7383      |
| <b>3</b> | Zn <sup>2+</sup> | 0   | -4631.1830      |
| <b>4</b> | Fe <sup>2+</sup> | 0   | -4688.9629      |
| <b>4</b> | Fe <sup>2+</sup> | 1   | -4689.0163      |
| <b>5</b> | Pt <sup>2+</sup> | 0   | -4684.6503      |
| <b>5</b> | Pt <sup>2+</sup> | 1   | -4684.6436      |
| <b>6</b> | Cd <sup>2+</sup> | 0   | -9179.7668      |



**Table S2.** The optimized Cartesian coordinates of the complex **1** in the ground singlet state calculated at the B3LYP/LanL2Dz level of theory

| Center<br>Number | Atomic<br>Number | Coordinates (Angstroms) |           |          |
|------------------|------------------|-------------------------|-----------|----------|
|                  |                  | X                       | Y         | Z        |
| 1                | 6                | 2.502814                | -4.949726 | 0.000000 |
| 2                | 6                | 1.268800                | -5.626955 | 0.000000 |
| 3                | 6                | 2.869774                | -7.207721 | 0.000000 |
| 4                | 6                | 3.530106                | -5.959280 | 0.000000 |
| 5                | 6                | 4.933952                | -5.954583 | 0.000000 |
| 6                | 6                | 5.952755                | -4.936106 | 0.000000 |
| 7                | 6                | 7.197045                | -5.605224 | 0.000000 |
| 8                | 6                | 5.602628                | -7.199004 | 0.000000 |
| 9                | 6                | 5.957986                | -3.532128 | 0.000000 |
| 10               | 6                | 2.504332                | -3.531420 | 0.000000 |
| 11               | 6                | 3.530562                | -2.505463 | 0.000000 |
| 12               | 6                | 4.948795                | -2.504462 | 0.000000 |
| 13               | 8                | 7.001650                | -7.004126 | 0.000000 |
| 14               | 6                | 1.268032                | -2.882290 | 0.000000 |
| 15               | 6                | 2.881878                | -1.268981 | 0.000000 |
| 16               | 6                | 7.206682                | -2.872243 | 0.000000 |
| 17               | 8                | 7.014154                | -1.469641 | 0.000000 |
| 18               | 6                | 4.942887                | -8.440909 | 0.000000 |
| 19               | 6                | 3.531816                | -8.446640 | 0.000000 |
| 20               | 6                | 8.445393                | -3.534751 | 0.000000 |
| 21               | 6                | 8.439162                | -4.945860 | 0.000000 |
| 22               | 1                | 5.504843                | -9.368343 | 0.000000 |
| 23               | 1                | 2.975404                | -9.377178 | 0.000000 |
| 24               | 1                | 9.376131                | -2.978582 | 0.000000 |
| 25               | 1                | 9.366435                | -5.508155 | 0.000000 |
| 26               | 8                | 1.471857                | -1.472262 | 0.000000 |
| 27               | 6                | -0.000622               | -4.983514 | 0.000000 |
| 28               | 6                | -0.000416               | -3.519547 | 0.000000 |
| 29               | 6                | -3.531348               | -2.504189 | 0.000000 |
| 30               | 6                | -2.882175               | -1.267776 | 0.000000 |
| 31               | 6                | -1.268800               | -2.881702 | 0.000000 |
| 32               | 6                | -2.505428               | -3.530456 | 0.000000 |
| 33               | 6                | -2.504126               | -4.949138 | 0.000000 |
| 34               | 6                | -3.531815               | -5.958274 | 0.000000 |
| 35               | 6                | -2.871925               | -7.207075 | 0.000000 |
| 36               | 6                | -1.270218               | -5.626791 | 0.000000 |
| 37               | 6                | -4.936142               | -5.952992 | 0.000000 |
| 38               | 6                | -4.949949               | -2.502471 | 0.000000 |
| 39               | 6                | -5.959433               | -3.529857 | 0.000000 |
| 40               | 6                | -5.954602               | -4.934223 | 0.000000 |
| 41               | 8                | -1.469451               | -7.014342 | 0.000000 |
| 42               | 8                | -1.472231               | -1.471630 | 0.000000 |
| 43               | 6                | -5.627207               | -1.268385 | 0.000000 |
| 44               | 6                | -7.208101               | -2.869571 | 0.000000 |
| 45               | 6                | -5.605173               | -7.197271 | 0.000000 |
| 46               | 8                | -7.004086               | -7.001850 | 0.000000 |
| 47               | 6                | -7.199077               | -5.602887 | 0.000000 |
| 48               | 6                | -4.945646               | -8.439328 | 0.000000 |
| 49               | 6                | -3.534615               | -8.445617 | 0.000000 |
| 50               | 6                | -8.440934               | -4.942976 | 0.000000 |
| 51               | 6                | -8.446859               | -3.531933 | 0.000000 |
| 52               | 1                | -5.507889               | -9.366613 | 0.000000 |
| 53               | 1                | -2.978687               | -9.376424 | 0.000000 |
| 54               | 1                | -9.368400               | -5.504964 | 0.000000 |
| 55               | 1                | -9.377500               | -2.975625 | 0.000000 |

|     |   |           |           |          |
|-----|---|-----------|-----------|----------|
| 56  | 8 | -7.014919 | -1.467066 | 0.000000 |
| 57  | 6 | 2.505428  | 3.530456  | 0.000000 |
| 58  | 6 | 1.268800  | 2.881702  | 0.000000 |
| 59  | 6 | 2.882175  | 1.267776  | 0.000000 |
| 60  | 6 | 3.531348  | 2.504189  | 0.000000 |
| 61  | 6 | 4.949949  | 2.502471  | 0.000000 |
| 62  | 6 | 5.959433  | 3.529857  | 0.000000 |
| 63  | 6 | 7.208101  | 2.869571  | 0.000000 |
| 64  | 6 | 5.627207  | 1.268385  | 0.000000 |
| 65  | 6 | 5.954602  | 4.934223  | 0.000000 |
| 66  | 6 | 2.504126  | 4.949138  | 0.000000 |
| 67  | 6 | 3.531815  | 5.958274  | 0.000000 |
| 68  | 6 | 4.936142  | 5.952992  | 0.000000 |
| 69  | 8 | 7.014919  | 1.467066  | 0.000000 |
| 70  | 8 | 1.472231  | 1.471630  | 0.000000 |
| 71  | 6 | 1.270218  | 5.626791  | 0.000000 |
| 72  | 6 | 2.871925  | 7.207075  | 0.000000 |
| 73  | 6 | 7.199077  | 5.602887  | 0.000000 |
| 74  | 8 | 7.004086  | 7.001850  | 0.000000 |
| 75  | 6 | 5.605173  | 7.197271  | 0.000000 |
| 76  | 6 | 4.983502  | -0.001027 | 0.000000 |
| 77  | 6 | 3.519513  | -0.000786 | 0.000000 |
| 78  | 6 | 8.440934  | 4.942976  | 0.000000 |
| 79  | 6 | 8.446859  | 3.531933  | 0.000000 |
| 80  | 6 | 4.945646  | 8.439328  | 0.000000 |
| 81  | 6 | 3.534615  | 8.445617  | 0.000000 |
| 82  | 1 | 9.368400  | 5.504964  | 0.000000 |
| 83  | 1 | 9.377500  | 2.975625  | 0.000000 |
| 84  | 1 | 5.507889  | 9.366613  | 0.000000 |
| 85  | 1 | 2.978687  | 9.376424  | 0.000000 |
| 86  | 8 | 1.469451  | 7.014342  | 0.000000 |
| 87  | 6 | 0.000416  | 3.519547  | 0.000000 |
| 88  | 6 | 0.000622  | 4.983514  | 0.000000 |
| 89  | 6 | -3.530106 | 5.959280  | 0.000000 |
| 90  | 6 | -2.869774 | 7.207721  | 0.000000 |
| 91  | 6 | -1.268800 | 5.626955  | 0.000000 |
| 92  | 6 | -2.502814 | 4.949726  | 0.000000 |
| 93  | 6 | -2.504332 | 3.531420  | 0.000000 |
| 94  | 6 | -3.530562 | 2.505463  | 0.000000 |
| 95  | 6 | -2.881878 | 1.268981  | 0.000000 |
| 96  | 6 | -1.268032 | 2.882290  | 0.000000 |
| 97  | 6 | -4.948795 | 2.504462  | 0.000000 |
| 98  | 6 | -4.933952 | 5.954583  | 0.000000 |
| 99  | 6 | -5.952755 | 4.936106  | 0.000000 |
| 100 | 6 | -5.957986 | 3.532128  | 0.000000 |
| 101 | 8 | -1.471857 | 1.472262  | 0.000000 |
| 102 | 8 | -1.467311 | 7.014615  | 0.000000 |
| 103 | 6 | -5.602628 | 7.199004  | 0.000000 |
| 104 | 6 | -7.197045 | 5.605224  | 0.000000 |
| 105 | 6 | -5.626491 | 1.270715  | 0.000000 |
| 106 | 8 | -7.014154 | 1.469641  | 0.000000 |
| 107 | 6 | -7.206682 | 2.872243  | 0.000000 |
| 108 | 6 | -4.983502 | 0.001027  | 0.000000 |
| 109 | 6 | -3.519513 | 0.000786  | 0.000000 |
| 110 | 6 | -4.942887 | 8.440909  | 0.000000 |
| 111 | 6 | -3.531816 | 8.446640  | 0.000000 |
| 112 | 6 | -8.445393 | 3.534751  | 0.000000 |
| 113 | 6 | -8.439162 | 4.945860  | 0.000000 |
| 114 | 1 | -5.504843 | 9.368343  | 0.000000 |
| 115 | 1 | -2.975404 | 9.377178  | 0.000000 |
| 116 | 1 | -9.376131 | 2.978582  | 0.000000 |
| 117 | 1 | -9.366435 | 5.508155  | 0.000000 |
| 118 | 8 | -7.001650 | 7.004126  | 0.000000 |

|     |    |          |           |          |
|-----|----|----------|-----------|----------|
| 119 | 6  | 5.626491 | -1.270715 | 0.000000 |
| 120 | 8  | 1.467311 | -7.014615 | 0.000000 |
| 121 | 29 | 0.000000 | 0.000000  | 0.000000 |

**Table S3.** The optimized Cartesian coordinates of the complex **2** in the ground doublet state calculated at the B3LYP/Lanl2Dz level of theory

| Center Number | Atomic Number | Coordinates (Angstroms) |           |           |
|---------------|---------------|-------------------------|-----------|-----------|
|               |               | X                       | Y         | Z         |
| 1             | 6             | 1.726812                | 5.270858  | -0.000560 |
| 2             | 6             | 3.083441                | 4.877197  | -0.000463 |
| 3             | 6             | 3.064288                | 7.125508  | -0.000335 |
| 4             | 6             | 1.715258                | 6.707594  | -0.000439 |
| 5             | 6             | 0.716906                | 7.698846  | -0.000316 |
| 6             | 6             | -0.716906               | 7.698846  | -0.000316 |
| 7             | 6             | -1.125799               | 9.056402  | -0.000127 |
| 8             | 6             | 1.125799                | 9.056402  | -0.000127 |
| 9             | 6             | -1.715258               | 6.707594  | -0.000439 |
| 10            | 6             | 0.725018                | 4.268525  | -0.000573 |
| 11            | 6             | -0.725018               | 4.268525  | -0.000573 |
| 12            | 6             | -1.726812               | 5.270858  | -0.000560 |
| 13            | 8             | 0.000000                | 9.904513  | -0.000038 |
| 14            | 6             | 1.141381                | 2.934911  | -0.000495 |
| 15            | 6             | -1.141381               | 2.934911  | -0.000495 |
| 16            | 6             | -3.064288               | 7.125508  | -0.000335 |
| 17            | 8             | -3.918903               | 5.995207  | -0.000352 |
| 18            | 6             | 2.468089                | 9.465787  | -0.000048 |
| 19            | 6             | 3.471549                | 8.468625  | -0.000133 |
| 20            | 6             | -3.471549               | 8.468625  | -0.000133 |
| 21            | 6             | -2.468089               | 9.465787  | -0.000048 |
| 22            | 1             | 2.729321                | 10.518221 | 0.000122  |
| 23            | 1             | 4.522514                | 8.735513  | -0.000041 |
| 24            | 1             | -4.522514               | 8.735513  | -0.000041 |
| 25            | 1             | -2.729321               | 10.518221 | 0.000122  |
| 26            | 8             | 0.000000                | 2.080926  | -0.000575 |
| 27            | 6             | 3.524508                | 3.524312  | -0.000422 |
| 28            | 6             | 2.489382                | 2.489051  | -0.000416 |
| 29            | 6             | 4.268993                | -0.725032 | -0.000458 |
| 30            | 6             | 2.935313                | -1.141293 | -0.000439 |
| 31            | 6             | 2.935313                | 1.141293  | -0.000439 |
| 32            | 6             | 4.268993                | 0.725032  | -0.000458 |
| 33            | 6             | 5.271138                | 1.726748  | -0.000416 |
| 34            | 6             | 6.707887                | 1.715236  | -0.000252 |
| 35            | 6             | 7.125797                | 3.064218  | -0.000132 |
| 36            | 6             | 4.877466                | 3.083321  | -0.000385 |
| 37            | 6             | 7.698970                | 0.716969  | -0.000091 |
| 38            | 6             | 5.271138                | -1.726748 | -0.000416 |
| 39            | 6             | 6.707887                | -1.715236 | -0.000252 |
| 40            | 6             | 7.698970                | -0.716969 | -0.000091 |
| 41            | 8             | 5.995458                | 3.918860  | -0.000258 |
| 42            | 8             | 2.081535                | 0.000000  | -0.000225 |
| 43            | 6             | 4.877466                | -3.083321 | -0.000385 |
| 44            | 6             | 7.125797                | -3.064218 | -0.000132 |
| 45            | 6             | 9.056478                | 1.125774  | 0.000201  |
| 46            | 8             | 9.904572                | 0.000000  | 0.000377  |
| 47            | 6             | 9.056478                | -1.125774 | 0.000201  |
| 48            | 6             | 9.466013                | 2.468008  | 0.000324  |
| 49            | 6             | 8.468973                | 3.471497  | 0.000146  |
| 50            | 6             | 9.466013                | -2.468008 | 0.000324  |

|     |   |            |           |           |
|-----|---|------------|-----------|-----------|
| 51  | 6 | 8.468973   | -3.471497 | 0.000146  |
| 52  | 1 | 10.518464  | 2.729133  | 0.000565  |
| 53  | 1 | 8.735836   | 4.522467  | 0.000245  |
| 54  | 1 | 10.518464  | -2.729133 | 0.000565  |
| 55  | 1 | 8.735836   | -4.522467 | 0.000245  |
| 56  | 8 | 5.995458   | -3.918860 | -0.000258 |
| 57  | 6 | -4.268993  | -0.725032 | -0.000458 |
| 58  | 6 | -2.935313  | -1.141293 | -0.000439 |
| 59  | 6 | -2.935313  | 1.141293  | -0.000439 |
| 60  | 6 | -4.268993  | 0.725032  | -0.000458 |
| 61  | 6 | -5.271138  | 1.726748  | -0.000416 |
| 62  | 6 | -6.707887  | 1.715236  | -0.000252 |
| 63  | 6 | -7.125797  | 3.064218  | -0.000132 |
| 64  | 6 | -4.877466  | 3.083321  | -0.000385 |
| 65  | 6 | -7.698970  | 0.716969  | -0.000091 |
| 66  | 6 | -5.271138  | -1.726748 | -0.000416 |
| 67  | 6 | -6.707887  | -1.715236 | -0.000252 |
| 68  | 6 | -7.698970  | -0.716969 | -0.000091 |
| 69  | 8 | -5.995458  | 3.918860  | -0.000258 |
| 70  | 8 | -2.081535  | 0.000000  | -0.000225 |
| 71  | 6 | -4.877466  | -3.083321 | -0.000385 |
| 72  | 6 | -7.125797  | -3.064218 | -0.000132 |
| 73  | 6 | -9.056478  | 1.125774  | 0.000201  |
| 74  | 8 | -9.904572  | 0.000000  | 0.000377  |
| 75  | 6 | -9.056478  | -1.125774 | 0.000201  |
| 76  | 6 | -3.524508  | 3.524312  | -0.000422 |
| 77  | 6 | -2.489382  | 2.489051  | -0.000416 |
| 78  | 6 | -9.466013  | 2.468008  | 0.000324  |
| 79  | 6 | -8.468973  | 3.471497  | 0.000146  |
| 80  | 6 | -9.466013  | -2.468008 | 0.000324  |
| 81  | 6 | -8.468973  | -3.471497 | 0.000146  |
| 82  | 1 | -10.518464 | 2.729133  | 0.000565  |
| 83  | 1 | -8.735836  | 4.522467  | 0.000245  |
| 84  | 1 | -10.518464 | -2.729133 | 0.000565  |
| 85  | 1 | -8.735836  | -4.522467 | 0.000245  |
| 86  | 8 | -5.995458  | -3.918860 | -0.000258 |
| 87  | 6 | -2.489382  | -2.489051 | -0.000416 |
| 88  | 6 | -3.524508  | -3.524312 | -0.000422 |
| 89  | 6 | -1.715258  | -6.707594 | -0.000439 |
| 90  | 6 | -3.064288  | -7.125508 | -0.000335 |
| 91  | 6 | -3.083441  | -4.877197 | -0.000463 |
| 92  | 6 | -1.726812  | -5.270858 | -0.000560 |
| 93  | 6 | -0.725018  | -4.268525 | -0.000573 |
| 94  | 6 | 0.725018   | -4.268525 | -0.000573 |
| 95  | 6 | 1.141381   | -2.934911 | -0.000495 |
| 96  | 6 | -1.141381  | -2.934911 | -0.000495 |
| 97  | 6 | 1.726812   | -5.270858 | -0.000560 |
| 98  | 6 | -0.716906  | -7.698846 | -0.000316 |
| 99  | 6 | 0.716906   | -7.698846 | -0.000316 |
| 100 | 6 | 1.715258   | -6.707594 | -0.000439 |
| 101 | 8 | 0.000000   | -2.080926 | -0.000575 |
| 102 | 8 | -3.918903  | -5.995207 | -0.000352 |
| 103 | 6 | -1.125799  | -9.056402 | -0.000127 |
| 104 | 6 | 1.125799   | -9.056402 | -0.000127 |
| 105 | 6 | 3.083441   | -4.877197 | -0.000463 |
| 106 | 8 | 3.918903   | -5.995207 | -0.000352 |
| 107 | 6 | 3.064288   | -7.125508 | -0.000335 |
| 108 | 6 | 3.524508   | -3.524312 | -0.000422 |
| 109 | 6 | 2.489382   | -2.489051 | -0.000416 |
| 110 | 6 | -2.468089  | -9.465787 | -0.000048 |
| 111 | 6 | -3.471549  | -8.468625 | -0.000133 |
| 112 | 6 | 3.471549   | -8.468625 | -0.000133 |
| 113 | 6 | 2.468089   | -9.465787 | -0.000048 |

|     |    |           |            |           |
|-----|----|-----------|------------|-----------|
| 114 | 1  | -2.729321 | -10.518221 | 0.000122  |
| 115 | 1  | -4.522514 | -8.735513  | -0.000041 |
| 116 | 1  | 4.522514  | -8.735513  | -0.000041 |
| 117 | 1  | 2.729321  | -10.518221 | 0.000122  |
| 118 | 8  | 0.000000  | -9.904513  | -0.000038 |
| 119 | 6  | -3.083441 | 4.877197   | -0.000463 |
| 120 | 8  | 3.918903  | 5.995207   | -0.000352 |
| 121 | 29 | 0.000000  | 0.000000   | 0.005629  |

**Table S4.** The optimized Cartesian coordinates of the complex **3** in the ground singlet state calculated the B3LYP/Lanl2Dz level of theory

| Center<br>Number | Atomic<br>Number | Coordinates (Angstroms) |           |          |
|------------------|------------------|-------------------------|-----------|----------|
|                  |                  | X                       | Y         | Z        |
| 1                | 6                | 5.264726                | 1.725523  | 0.000000 |
| 2                | 6                | 4.875713                | 3.081888  | 0.000000 |
| 3                | 6                | 7.122563                | 3.062203  | 0.000000 |
| 4                | 6                | 6.704962                | 1.712625  | 0.000000 |
| 5                | 6                | 7.696273                | 0.718712  | 0.000000 |
| 6                | 6                | 7.696272                | -0.718705 | 0.000000 |
| 7                | 6                | 9.048925                | -1.126032 | 0.000000 |
| 8                | 6                | 9.048925                | 1.126032  | 0.000000 |
| 9                | 6                | 6.704961                | -1.712627 | 0.000000 |
| 10               | 6                | 4.255430                | 0.726269  | 0.000000 |
| 11               | 6                | 4.255433                | -0.726259 | 0.000000 |
| 12               | 6                | 5.264727                | -1.725524 | 0.000000 |
| 13               | 8                | 9.897214                | 0.000001  | 0.000000 |
| 14               | 6                | 2.931395                | 1.152827  | 0.000000 |
| 15               | 6                | 2.931396                | -1.152826 | 0.000000 |
| 16               | 6                | 7.122563                | -3.062204 | 0.000000 |
| 17               | 8                | 5.991552                | -3.916886 | 0.000000 |
| 18               | 6                | 9.459603                | 2.471784  | 0.000000 |
| 19               | 6                | 8.465942                | 3.472572  | 0.000000 |
| 20               | 6                | 8.465943                | -3.472570 | 0.000000 |
| 21               | 6                | 9.459601                | -2.471784 | 0.000000 |
| 22               | 1                | 10.512505               | 2.731322  | 0.000000 |
| 23               | 1                | 8.730081                | 4.523976  | 0.000000 |
| 24               | 1                | 8.730083                | -4.523974 | 0.000000 |
| 25               | 1                | 10.512503               | -2.731319 | 0.000000 |
| 26               | 8                | 2.042328                | 0.000001  | 0.000000 |
| 27               | 6                | 3.527142                | 3.527142  | 0.000000 |
| 28               | 6                | 2.492454                | 2.492453  | 0.000000 |
| 29               | 6                | -0.726269               | 4.255422  | 0.000000 |
| 30               | 6                | -1.152828               | 2.931390  | 0.000000 |
| 31               | 6                | 1.152826                | 2.931391  | 0.000000 |
| 32               | 6                | 0.726258                | 4.255424  | 0.000000 |
| 33               | 6                | 1.725516                | 5.264719  | 0.000000 |
| 34               | 6                | 1.712623                | 6.704948  | 0.000000 |
| 35               | 6                | 3.062200                | 7.122555  | 0.000000 |
| 36               | 6                | 3.081884                | 4.875709  | 0.000000 |
| 37               | 6                | 0.718705                | 7.696254  | 0.000000 |
| 38               | 6                | -1.725515               | 5.264717  | 0.000000 |
| 39               | 6                | -1.712622               | 6.704950  | 0.000000 |
| 40               | 6                | -0.718712               | 7.696255  | 0.000000 |
| 41               | 8                | 3.916885                | 5.991544  | 0.000000 |
| 42               | 8                | -0.000001               | 2.042317  | 0.000000 |
| 43               | 6                | -3.081880               | 4.875710  | 0.000000 |
| 44               | 6                | -3.062199               | 7.122555  | 0.000000 |

|     |   |           |            |          |
|-----|---|-----------|------------|----------|
| 45  | 6 | 1.126034  | 9.048905   | 0.000000 |
| 46  | 8 | -0.000001 | 9.897195   | 0.000000 |
| 47  | 6 | -1.126034 | 9.048905   | 0.000000 |
| 48  | 6 | 2.471785  | 9.459591   | 0.000000 |
| 49  | 6 | 3.472573  | 8.465936   | 0.000000 |
| 50  | 6 | -2.471784 | 9.459593   | 0.000000 |
| 51  | 6 | -3.472574 | 8.465935   | 0.000000 |
| 52  | 1 | 2.731322  | 10.512495  | 0.000000 |
| 53  | 1 | 4.523978  | 8.730075   | 0.000000 |
| 54  | 1 | -2.731324 | 10.512497  | 0.000000 |
| 55  | 1 | -4.523980 | 8.730073   | 0.000000 |
| 56  | 8 | -3.916886 | 5.991542   | 0.000000 |
| 57  | 6 | -0.726258 | -4.255424  | 0.000000 |
| 58  | 6 | -1.152826 | -2.931391  | 0.000000 |
| 59  | 6 | 1.152828  | -2.931390  | 0.000000 |
| 60  | 6 | 0.726269  | -4.255422  | 0.000000 |
| 61  | 6 | 1.725515  | -5.264717  | 0.000000 |
| 62  | 6 | 1.712622  | -6.704950  | 0.000000 |
| 63  | 6 | 3.062199  | -7.122555  | 0.000000 |
| 64  | 6 | 3.081880  | -4.875710  | 0.000000 |
| 65  | 6 | 0.718712  | -7.696255  | 0.000000 |
| 66  | 6 | -1.725516 | -5.264719  | 0.000000 |
| 67  | 6 | -1.712623 | -6.704948  | 0.000000 |
| 68  | 6 | -0.718705 | -7.696254  | 0.000000 |
| 69  | 8 | 3.916886  | -5.991542  | 0.000000 |
| 70  | 8 | 0.000001  | -2.042317  | 0.000000 |
| 71  | 6 | -3.081884 | -4.875709  | 0.000000 |
| 72  | 6 | -3.062200 | -7.122555  | 0.000000 |
| 73  | 6 | 1.126034  | -9.048905  | 0.000000 |
| 74  | 8 | 0.000001  | -9.897195  | 0.000000 |
| 75  | 6 | -1.126034 | -9.048905  | 0.000000 |
| 76  | 6 | 3.527140  | -3.527145  | 0.000000 |
| 77  | 6 | 2.492454  | -2.492453  | 0.000000 |
| 78  | 6 | 2.471784  | -9.459593  | 0.000000 |
| 79  | 6 | 3.472574  | -8.465935  | 0.000000 |
| 80  | 6 | -2.471785 | -9.459591  | 0.000000 |
| 81  | 6 | -3.472573 | -8.465936  | 0.000000 |
| 82  | 1 | 2.731324  | -10.512497 | 0.000000 |
| 83  | 1 | 4.523980  | -8.730073  | 0.000000 |
| 84  | 1 | -2.731322 | -10.512495 | 0.000000 |
| 85  | 1 | -4.523978 | -8.730075  | 0.000000 |
| 86  | 8 | -3.916885 | -5.991544  | 0.000000 |
| 87  | 6 | -2.492454 | -2.492453  | 0.000000 |
| 88  | 6 | -3.527142 | -3.527142  | 0.000000 |
| 89  | 6 | -6.704962 | -1.712625  | 0.000000 |
| 90  | 6 | -7.122563 | -3.062203  | 0.000000 |
| 91  | 6 | -4.875713 | -3.081888  | 0.000000 |
| 92  | 6 | -5.264726 | -1.725523  | 0.000000 |
| 93  | 6 | -4.255430 | -0.726269  | 0.000000 |
| 94  | 6 | -4.255433 | 0.726259   | 0.000000 |
| 95  | 6 | -2.931396 | 1.152826   | 0.000000 |
| 96  | 6 | -2.931395 | -1.152827  | 0.000000 |
| 97  | 6 | -5.264727 | 1.725524   | 0.000000 |
| 98  | 6 | -7.696273 | -0.718712  | 0.000000 |
| 99  | 6 | -7.696272 | 0.718705   | 0.000000 |
| 100 | 6 | -6.704961 | 1.712627   | 0.000000 |
| 101 | 8 | -2.042328 | -0.000001  | 0.000000 |
| 102 | 8 | -5.991550 | -3.916887  | 0.000000 |
| 103 | 6 | -9.048925 | -1.126032  | 0.000000 |
| 104 | 6 | -9.048925 | 1.126032   | 0.000000 |
| 105 | 6 | -4.875711 | 3.081891   | 0.000000 |
| 106 | 8 | -5.991552 | 3.916886   | 0.000000 |
| 107 | 6 | -7.122563 | 3.062204   | 0.000000 |

|     |    |            |           |          |
|-----|----|------------|-----------|----------|
| 108 | 6  | -3.527140  | 3.527145  | 0.000000 |
| 109 | 6  | -2.492454  | 2.492453  | 0.000000 |
| 110 | 6  | -9.459603  | -2.471784 | 0.000000 |
| 111 | 6  | -8.465942  | -3.472572 | 0.000000 |
| 112 | 6  | -8.465943  | 3.472570  | 0.000000 |
| 113 | 6  | -9.459601  | 2.471784  | 0.000000 |
| 114 | 1  | -10.512505 | -2.731322 | 0.000000 |
| 115 | 1  | -8.730081  | -4.523976 | 0.000000 |
| 116 | 1  | -8.730083  | 4.523974  | 0.000000 |
| 117 | 1  | -10.512503 | 2.731319  | 0.000000 |
| 118 | 8  | -9.897214  | -0.000001 | 0.000000 |
| 119 | 6  | 4.875711   | -3.081891 | 0.000000 |
| 120 | 8  | 5.991550   | 3.916887  | 0.000000 |
| 121 | 30 | 0.000000   | 0.000000  | 0.000000 |

**Table S5.** The optimized Cartesian coordinates of the complex **4** in the ground triplet state calculated at the B3LYP/LanL2Dz level of theory

| Center<br>Number | Atomic<br>Number | Coordinates (Angstroms) |           |           |
|------------------|------------------|-------------------------|-----------|-----------|
|                  |                  | X                       | Y         | Z         |
| 1                | 6                | 0.000000                | 5.244694  | 1.719063  |
| 2                | 6                | 0.000000                | 4.857437  | 3.078781  |
| 3                | 6                | 0.000000                | 7.102915  | 3.058184  |
| 4                | 6                | 0.000000                | 6.685532  | 1.708816  |
| 5                | 6                | 0.000000                | 7.678655  | 0.718272  |
| 6                | 6                | 0.000000                | 7.678655  | -0.718272 |
| 7                | 6                | 0.000000                | 9.030627  | -1.125522 |
| 8                | 6                | 0.000000                | 9.030627  | 1.125522  |
| 9                | 6                | 0.000000                | 6.685532  | -1.708816 |
| 10               | 6                | 0.000000                | 4.233820  | 0.725025  |
| 11               | 6                | 0.000000                | 4.233820  | -0.725025 |
| 12               | 6                | 0.000000                | 5.244694  | -1.719063 |
| 13               | 8                | 0.000000                | 9.879109  | 0.000000  |
| 14               | 6                | 0.000000                | 2.906029  | 1.147503  |
| 15               | 6                | 0.000000                | 2.906029  | -1.147503 |
| 16               | 6                | 0.000000                | 7.102915  | -3.058184 |
| 17               | 8                | 0.000000                | 5.971719  | -3.913476 |
| 18               | 6                | 0.000000                | 9.440660  | 2.471965  |
| 19               | 6                | 0.000000                | 8.445277  | 3.471095  |
| 20               | 6                | 0.000000                | 8.445277  | -3.471095 |
| 21               | 6                | 0.000000                | 9.440660  | -2.471965 |
| 22               | 1                | 0.000000                | 10.493254 | 2.732826  |
| 23               | 1                | 0.000000                | 8.707282  | 4.522999  |
| 24               | 1                | 0.000000                | 8.707282  | -4.522999 |
| 25               | 1                | 0.000000                | 10.493254 | -2.732826 |
| 26               | 8                | 0.000000                | 2.011907  | 0.000000  |
| 27               | 6                | 0.000000                | 3.513122  | 3.522382  |
| 28               | 6                | 0.000000                | 2.477487  | 2.488236  |
| 29               | 6                | 0.000000                | -0.722423 | 4.251736  |
| 30               | 6                | 0.000000                | -1.141000 | 2.920096  |
| 31               | 6                | 0.000000                | 1.141000  | 2.920096  |
| 32               | 6                | 0.000000                | 0.722423  | 4.251736  |
| 33               | 6                | 0.000000                | 1.719871  | 5.262250  |
| 34               | 6                | 0.000000                | 1.709355  | 6.702820  |
| 35               | 6                | 0.000000                | 3.059162  | 7.118768  |
| 36               | 6                | 0.000000                | 3.073696  | 4.873086  |
| 37               | 6                | 0.000000                | 0.718260  | 7.695527  |
| 38               | 6                | 0.000000                | -1.719871 | 5.262250  |
| 39               | 6                | 0.000000                | -1.709355 | 6.702820  |

|     |   |          |           |            |
|-----|---|----------|-----------|------------|
| 40  | 6 | 0.000000 | -0.718260 | 7.695527   |
| 41  | 8 | 0.000000 | 3.911845  | 5.985984   |
| 42  | 8 | 0.000000 | 0.000000  | 2.038485   |
| 43  | 6 | 0.000000 | -3.073696 | 4.873086   |
| 44  | 6 | 0.000000 | -3.059162 | 7.118768   |
| 45  | 6 | 0.000000 | 1.126138  | 9.047939   |
| 46  | 8 | 0.000000 | 0.000000  | 9.896666   |
| 47  | 6 | 0.000000 | -1.126138 | 9.047939   |
| 48  | 6 | 0.000000 | 2.472276  | 9.457141   |
| 49  | 6 | 0.000000 | 3.471593  | 8.461606   |
| 50  | 6 | 0.000000 | -2.472276 | 9.457141   |
| 51  | 6 | 0.000000 | -3.471593 | 8.461606   |
| 52  | 1 | 0.000000 | 2.733576  | 10.509604  |
| 53  | 1 | 0.000000 | 4.523354  | 8.724413   |
| 54  | 1 | 0.000000 | -2.733576 | 10.509604  |
| 55  | 1 | 0.000000 | -4.523354 | 8.724413   |
| 56  | 8 | 0.000000 | -3.911845 | 5.985984   |
| 57  | 6 | 0.000000 | -0.722423 | -4.251736  |
| 58  | 6 | 0.000000 | -1.141000 | -2.920096  |
| 59  | 6 | 0.000000 | 1.141000  | -2.920096  |
| 60  | 6 | 0.000000 | 0.722423  | -4.251736  |
| 61  | 6 | 0.000000 | 1.719871  | -5.262250  |
| 62  | 6 | 0.000000 | 1.709355  | -6.702820  |
| 63  | 6 | 0.000000 | 3.059162  | -7.118768  |
| 64  | 6 | 0.000000 | 3.073696  | -4.873086  |
| 65  | 6 | 0.000000 | 0.718260  | -7.695527  |
| 66  | 6 | 0.000000 | -1.719871 | -5.262250  |
| 67  | 6 | 0.000000 | -1.709355 | -6.702820  |
| 68  | 6 | 0.000000 | -0.718260 | -7.695527  |
| 69  | 8 | 0.000000 | 3.911845  | -5.985984  |
| 70  | 8 | 0.000000 | 0.000000  | -2.038485  |
| 71  | 6 | 0.000000 | -3.073696 | -4.873086  |
| 72  | 6 | 0.000000 | -3.059162 | -7.118768  |
| 73  | 6 | 0.000000 | 1.126138  | -9.047939  |
| 74  | 8 | 0.000000 | 0.000000  | -9.896666  |
| 75  | 6 | 0.000000 | -1.126138 | -9.047939  |
| 76  | 6 | 0.000000 | 3.513122  | -3.522382  |
| 77  | 6 | 0.000000 | 2.477487  | -2.488236  |
| 78  | 6 | 0.000000 | 2.472276  | -9.457141  |
| 79  | 6 | 0.000000 | 3.471593  | -8.461606  |
| 80  | 6 | 0.000000 | -2.472276 | -9.457141  |
| 81  | 6 | 0.000000 | -3.471593 | -8.461606  |
| 82  | 1 | 0.000000 | 2.733576  | -10.509604 |
| 83  | 1 | 0.000000 | 4.523354  | -8.724413  |
| 84  | 1 | 0.000000 | -2.733576 | -10.509604 |
| 85  | 1 | 0.000000 | -4.523354 | -8.724413  |
| 86  | 8 | 0.000000 | -3.911845 | -5.985984  |
| 87  | 6 | 0.000000 | -2.477487 | -2.488236  |
| 88  | 6 | 0.000000 | -3.513122 | -3.522382  |
| 89  | 6 | 0.000000 | -6.685532 | -1.708816  |
| 90  | 6 | 0.000000 | -7.102915 | -3.058184  |
| 91  | 6 | 0.000000 | -4.857437 | -3.078781  |
| 92  | 6 | 0.000000 | -5.244694 | -1.719063  |
| 93  | 6 | 0.000000 | -4.233820 | -0.725025  |
| 94  | 6 | 0.000000 | -4.233820 | 0.725025   |
| 95  | 6 | 0.000000 | -2.906029 | 1.147503   |
| 96  | 6 | 0.000000 | -2.906029 | -1.147503  |
| 97  | 6 | 0.000000 | -5.244694 | 1.719063   |
| 98  | 6 | 0.000000 | -7.678655 | -0.718272  |
| 99  | 6 | 0.000000 | -7.678655 | 0.718272   |
| 100 | 6 | 0.000000 | -6.685532 | 1.708816   |
| 101 | 8 | 0.000000 | -2.011907 | 0.000000   |
| 102 | 8 | 0.000000 | -5.971719 | -3.913476  |



|     |    |          |            |           |
|-----|----|----------|------------|-----------|
| 103 | 6  | 0.000000 | -9.030627  | -1.125522 |
| 104 | 6  | 0.000000 | -9.030627  | 1.125522  |
| 105 | 6  | 0.000000 | -4.857437  | 3.078781  |
| 106 | 8  | 0.000000 | -5.971719  | 3.913476  |
| 107 | 6  | 0.000000 | -7.102915  | 3.058184  |
| 108 | 6  | 0.000000 | -3.513122  | 3.522382  |
| 109 | 6  | 0.000000 | -2.477487  | 2.488236  |
| 110 | 6  | 0.000000 | -9.440660  | -2.471965 |
| 111 | 6  | 0.000000 | -8.445277  | -3.471095 |
| 112 | 6  | 0.000000 | -8.445277  | 3.471095  |
| 113 | 6  | 0.000000 | -9.440660  | 2.471965  |
| 114 | 1  | 0.000000 | -10.493254 | -2.732826 |
| 115 | 1  | 0.000000 | -8.707282  | -4.522999 |
| 116 | 1  | 0.000000 | -8.707282  | 4.522999  |
| 117 | 1  | 0.000000 | -10.493254 | 2.732826  |
| 118 | 8  | 0.000000 | -9.879109  | 0.000000  |
| 119 | 6  | 0.000000 | 4.857437   | -3.078781 |
| 120 | 8  | 0.000000 | 5.971719   | 3.913476  |
| 121 | 26 | 0.000000 | 0.000000   | 0.000000  |

**Table S6.** The optimized Cartesian coordinates of the complex **4** in the exited singlet state calculated at the B3LYP/LanL2Dz level of theory

| Center<br>Number | Atomic<br>Number | Coordinates (Angstroms) |           |          |
|------------------|------------------|-------------------------|-----------|----------|
|                  |                  | X                       | Y         | Z        |
| 1                | 6                | -1.095022               | 5.369624  | 0.000000 |
| 2                | 6                | -2.476440               | 5.157991  | 0.000000 |
| 3                | 6                | -2.205785               | 7.342260  | 0.000000 |
| 4                | 6                | -0.920391               | 6.787812  | 0.000000 |
| 5                | 6                | 0.172478                | 7.656201  | 0.000000 |
| 6                | 6                | 1.585927                | 7.492000  | 0.000000 |
| 7                | 6                | 2.130885                | 8.781635  | 0.000000 |
| 8                | 6                | -0.062397               | 9.036493  | 0.000000 |
| 9                | 6                | 2.450479                | 6.396184  | 0.000000 |
| 10               | 6                | -0.229554               | 4.252907  | 0.000000 |
| 11               | 6                | 1.196923                | 4.087142  | 0.000000 |
| 12               | 6                | 2.295316                | 4.975748  | 0.000000 |
| 13               | 8                | 1.129751                | 9.730839  | 0.000000 |
| 14               | 6                | -0.789766               | 2.992179  | 0.000000 |
| 15               | 6                | 1.453517                | 2.731532  | 0.000000 |
| 16               | 6                | 3.828755                | 6.641196  | 0.000000 |
| 17               | 8                | 4.528456                | 5.443291  | 0.000000 |
| 18               | 6                | -1.351731               | 9.587888  | 0.000000 |
| 19               | 6                | -2.450479               | 8.720325  | 0.000000 |
| 20               | 6                | 4.382932                | 7.926459  | 0.000000 |
| 21               | 6                | 3.512285                | 9.022903  | 0.000000 |
| 22               | 1                | -1.496523               | 10.662655 | 0.000000 |
| 23               | 1                | -3.463091               | 9.107301  | 0.000000 |
| 24               | 1                | 5.457238                | 8.070797  | 0.000000 |
| 25               | 1                | 3.899649                | 10.035787 | 0.000000 |
| 26               | 8                | 0.229554                | 1.983175  | 0.000000 |
| 27               | 6                | -3.068084               | 3.873814  | 0.000000 |
| 28               | 6                | -2.161848               | 2.729728  | 0.000000 |
| 29               | 6                | -4.252634               | -0.229765 | 0.000000 |
| 30               | 6                | -2.991402               | -0.789994 | 0.000000 |
| 31               | 6                | -2.730946               | 1.453667  | 0.000000 |
| 32               | 6                | -4.087054               | 1.197351  | 0.000000 |
| 33               | 6                | -4.975942               | 2.295991  | 0.000000 |

|    |   |            |           |          |
|----|---|------------|-----------|----------|
| 34 | 6 | -6.396695  | 2.450697  | 0.000000 |
| 35 | 6 | -6.642178  | 3.829253  | 0.000000 |
| 36 | 6 | -4.453704  | 3.592469  | 0.000000 |
| 37 | 6 | -7.492726  | 1.585748  | 0.000000 |
| 38 | 6 | -5.369343  | -1.095663 | 0.000000 |
| 39 | 6 | -6.787827  | -0.920926 | 0.000000 |
| 40 | 6 | -7.656681  | 0.172232  | 0.000000 |
| 41 | 8 | -5.444158  | 4.529353  | 0.000000 |
| 42 | 8 | -1.982660  | 0.229435  | 0.000000 |
| 43 | 6 | -5.157546  | -2.477208 | 0.000000 |
| 44 | 6 | -7.342122  | -2.206846 | 0.000000 |
| 45 | 6 | -8.782444  | 2.130450  | 0.000000 |
| 46 | 8 | -9.731414  | 1.129222  | 0.000000 |
| 47 | 6 | -9.037036  | -0.062882 | 0.000000 |
| 48 | 6 | -9.023502  | 3.511455  | 0.000000 |
| 49 | 6 | -7.927874  | 4.382283  | 0.000000 |
| 50 | 6 | -9.587738  | -1.352472 | 0.000000 |
| 51 | 6 | -8.720291  | -2.451089 | 0.000000 |
| 52 | 1 | -10.036381 | 3.898241  | 0.000000 |
| 53 | 1 | -8.072682  | 5.456454  | 0.000000 |
| 54 | 1 | -10.662335 | -1.497083 | 0.000000 |
| 55 | 1 | -9.107227  | -3.463495 | 0.000000 |
| 56 | 8 | -6.335995  | -3.162320 | 0.000000 |
| 57 | 6 | 4.087054   | -1.197351 | 0.000000 |
| 58 | 6 | 2.730946   | -1.453667 | 0.000000 |
| 59 | 6 | 2.991402   | 0.789994  | 0.000000 |
| 60 | 6 | 4.252634   | 0.229765  | 0.000000 |
| 61 | 6 | 5.369343   | 1.095663  | 0.000000 |
| 62 | 6 | 6.787827   | 0.920926  | 0.000000 |
| 63 | 6 | 7.342122   | 2.206846  | 0.000000 |
| 64 | 6 | 5.157546   | 2.477208  | 0.000000 |
| 65 | 6 | 7.656681   | -0.172232 | 0.000000 |
| 66 | 6 | 4.975942   | -2.295991 | 0.000000 |
| 67 | 6 | 6.396695   | -2.450697 | 0.000000 |
| 68 | 6 | 7.492726   | -1.585748 | 0.000000 |
| 69 | 8 | 6.335995   | 3.162320  | 0.000000 |
| 70 | 8 | 1.982660   | -0.229435 | 0.000000 |
| 71 | 6 | 4.453704   | -3.592469 | 0.000000 |
| 72 | 6 | 6.642178   | -3.829253 | 0.000000 |
| 73 | 6 | 9.037036   | 0.062882  | 0.000000 |
| 74 | 8 | 9.731414   | -1.129222 | 0.000000 |
| 75 | 6 | 8.782444   | -2.130450 | 0.000000 |
| 76 | 6 | 3.873118   | 3.067991  | 0.000000 |
| 77 | 6 | 2.729343   | 2.162245  | 0.000000 |
| 78 | 6 | 9.587738   | 1.352472  | 0.000000 |
| 79 | 6 | 8.720291   | 2.451089  | 0.000000 |
| 80 | 6 | 9.023502   | -3.511455 | 0.000000 |
| 81 | 6 | 7.927874   | -4.382283 | 0.000000 |
| 82 | 1 | 10.662335  | 1.497083  | 0.000000 |
| 83 | 1 | 9.107227   | 3.463495  | 0.000000 |
| 84 | 1 | 10.036381  | -3.898241 | 0.000000 |
| 85 | 1 | 8.072682   | -5.456454 | 0.000000 |
| 86 | 8 | 5.444158   | -4.529353 | 0.000000 |
| 87 | 6 | 2.161848   | -2.729728 | 0.000000 |
| 88 | 6 | 3.068084   | -3.873814 | 0.000000 |
| 89 | 6 | 0.920391   | -6.787812 | 0.000000 |
| 90 | 6 | 2.205785   | -7.342260 | 0.000000 |
| 91 | 6 | 2.476440   | -5.157991 | 0.000000 |
| 92 | 6 | 1.095022   | -5.369624 | 0.000000 |
| 93 | 6 | 0.229554   | -4.252907 | 0.000000 |
| 94 | 6 | -1.196923  | -4.087142 | 0.000000 |
| 95 | 6 | -1.453517  | -2.731532 | 0.000000 |
| 96 | 6 | 0.789766   | -2.992179 | 0.000000 |

|     |    |           |            |          |
|-----|----|-----------|------------|----------|
| 97  | 6  | -2.295316 | -4.975748  | 0.000000 |
| 98  | 6  | -0.172478 | -7.656201  | 0.000000 |
| 99  | 6  | -1.585927 | -7.492000  | 0.000000 |
| 100 | 6  | -2.450479 | -6.396184  | 0.000000 |
| 101 | 8  | -0.229554 | -1.983175  | 0.000000 |
| 102 | 8  | 3.161641  | -6.336778  | 0.000000 |
| 103 | 6  | 0.062397  | -9.036493  | 0.000000 |
| 104 | 6  | -2.130885 | -8.781635  | 0.000000 |
| 105 | 6  | -3.591427 | -4.453243  | 0.000000 |
| 106 | 8  | -4.528456 | -5.443291  | 0.000000 |
| 107 | 6  | -3.828755 | -6.641196  | 0.000000 |
| 108 | 6  | -3.873118 | -3.067991  | 0.000000 |
| 109 | 6  | -2.729343 | -2.162245  | 0.000000 |
| 110 | 6  | 1.351731  | -9.587888  | 0.000000 |
| 111 | 6  | 2.450479  | -8.720325  | 0.000000 |
| 112 | 6  | -4.382932 | -7.926459  | 0.000000 |
| 113 | 6  | -3.512285 | -9.022903  | 0.000000 |
| 114 | 1  | 1.496523  | -10.662655 | 0.000000 |
| 115 | 1  | 3.463091  | -9.107301  | 0.000000 |
| 116 | 1  | -5.457238 | -8.070797  | 0.000000 |
| 117 | 1  | -3.899649 | -10.035787 | 0.000000 |
| 118 | 8  | -1.129751 | -9.730839  | 0.000000 |
| 119 | 6  | 3.591427  | 4.453243   | 0.000000 |
| 120 | 8  | -3.161641 | 6.336778   | 0.000000 |
| 121 | 26 | 0.000000  | 0.000000   | 0.000000 |

**Table S7.** The optimized Cartesian coordinates of the complex **5** in the ground singlet state calculated at the B3LYP/LanL2Dz level of theory

| Center Number | Atomic Number | Coordinates (Angstroms) |           |          |
|---------------|---------------|-------------------------|-----------|----------|
|               |               | X                       | Y         | Z        |
| 1             | 6             | -1.726848               | 5.266406  | 0.000000 |
| 2             | 6             | -3.083454               | 4.877683  | 0.000000 |
| 3             | 6             | -3.062455               | 7.124214  | 0.000000 |
| 4             | 6             | -1.713104               | 6.706256  | 0.000000 |
| 5             | 6             | -0.718695               | 7.696739  | 0.000000 |
| 6             | 6             | 0.718577                | 7.696711  | 0.000000 |
| 7             | 6             | 1.125869                | 9.049319  | 0.000000 |
| 8             | 6             | -1.125957               | 9.049327  | 0.000000 |
| 9             | 6             | 1.713152                | 6.706224  | 0.000000 |
| 10            | 6             | -0.726464               | 4.258690  | 0.000000 |
| 11            | 6             | 0.726413                | 4.258726  | 0.000000 |
| 12            | 6             | 1.726920                | 5.266477  | 0.000000 |
| 13            | 8             | 0.000001                | 9.897948  | 0.000000 |
| 14            | 6             | -1.158141               | 2.936477  | 0.000000 |
| 15            | 6             | 1.158139                | 2.936488  | 0.000000 |
| 16            | 6             | 3.062539                | 7.124248  | 0.000000 |
| 17            | 8             | 3.917829                | 5.993752  | 0.000000 |
| 18            | 6             | -2.471954               | 9.460761  | 0.000000 |
| 19            | 6             | -3.472940               | 8.467448  | 0.000000 |
| 20            | 6             | 3.472793                | 8.467697  | 0.000000 |
| 21            | 6             | 2.471681                | 9.460821  | 0.000000 |
| 22            | 1             | -2.730806               | 10.514060 | 0.000000 |
| 23            | 1             | -4.524286               | 8.732017  | 0.000000 |
| 24            | 1             | 4.524159                | 8.732322  | 0.000000 |
| 25            | 1             | 2.730495                | 10.514061 | 0.000000 |
| 26            | 8             | 0.000010                | 2.062903  | 0.000000 |
| 27            | 6             | -3.529468               | 3.529496  | 0.000000 |
| 28            | 6             | -2.494562               | 2.494569  | 0.000000 |

|    |   |            |           |          |
|----|---|------------|-----------|----------|
| 29 | 6 | -4.258744  | -0.726487 | 0.000000 |
| 30 | 6 | -2.936521  | -1.158181 | 0.000000 |
| 31 | 6 | -2.936531  | 1.158178  | 0.000000 |
| 32 | 6 | -4.258780  | 0.726434  | 0.000000 |
| 33 | 6 | -5.266519  | 1.726822  | 0.000000 |
| 34 | 6 | -6.706297  | 1.713122  | 0.000000 |
| 35 | 6 | -7.124237  | 3.062497  | 0.000000 |
| 36 | 6 | -4.877717  | 3.083495  | 0.000000 |
| 37 | 6 | -7.696592  | 0.718648  | 0.000000 |
| 38 | 6 | -5.266447  | -1.726751 | 0.000000 |
| 39 | 6 | -6.706330  | -1.713073 | 0.000000 |
| 40 | 6 | -7.696620  | -0.718764 | 0.000000 |
| 41 | 8 | -5.993692  | 3.917777  | 0.000000 |
| 42 | 8 | -2.062895  | 0.000010  | 0.000000 |
| 43 | 6 | -4.877666  | -3.083355 | 0.000000 |
| 44 | 6 | -7.124204  | -3.062412 | 0.000000 |
| 45 | 6 | -9.049207  | 1.125823  | 0.000000 |
| 46 | 8 | -9.897838  | 0.000002  | 0.000000 |
| 47 | 6 | -9.049216  | -1.125907 | 0.000000 |
| 48 | 6 | -9.460804  | 2.471581  | 0.000000 |
| 49 | 6 | -8.467680  | 3.472788  | 0.000000 |
| 50 | 6 | -9.460746  | -2.471851 | 0.000000 |
| 51 | 6 | -8.467433  | -3.472933 | 0.000000 |
| 52 | 1 | -10.514049 | 2.730306  | 0.000000 |
| 53 | 1 | -8.732237  | 4.524154  | 0.000000 |
| 54 | 1 | -10.514050 | -2.730613 | 0.000000 |
| 55 | 1 | -8.731937  | -4.524280 | 0.000000 |
| 56 | 8 | -5.993658  | -3.917601 | 0.000000 |
| 57 | 6 | 4.258780   | -0.726434 | 0.000000 |
| 58 | 6 | 2.936531   | -1.158178 | 0.000000 |
| 59 | 6 | 2.936521   | 1.158181  | 0.000000 |
| 60 | 6 | 4.258744   | 0.726487  | 0.000000 |
| 61 | 6 | 5.266447   | 1.726751  | 0.000000 |
| 62 | 6 | 6.706330   | 1.713073  | 0.000000 |
| 63 | 6 | 7.124204   | 3.062412  | 0.000000 |
| 64 | 6 | 4.877666   | 3.083355  | 0.000000 |
| 65 | 6 | 7.696620   | 0.718764  | 0.000000 |
| 66 | 6 | 5.266519   | -1.726822 | 0.000000 |
| 67 | 6 | 6.706297   | -1.713122 | 0.000000 |
| 68 | 6 | 7.696592   | -0.718648 | 0.000000 |
| 69 | 8 | 5.993658   | 3.917601  | 0.000000 |
| 70 | 8 | 2.062895   | -0.000010 | 0.000000 |
| 71 | 6 | 4.877717   | -3.083495 | 0.000000 |
| 72 | 6 | 7.124237   | -3.062497 | 0.000000 |
| 73 | 6 | 9.049216   | 1.125907  | 0.000000 |
| 74 | 8 | 9.897838   | -0.000002 | 0.000000 |
| 75 | 6 | 9.049207   | -1.125823 | 0.000000 |
| 76 | 6 | 3.529521   | 3.529445  | 0.000000 |
| 77 | 6 | 2.494562   | 2.494570  | 0.000000 |
| 78 | 6 | 9.460746   | 2.471851  | 0.000000 |
| 79 | 6 | 8.467433   | 3.472933  | 0.000000 |
| 80 | 6 | 9.460804   | -2.471581 | 0.000000 |
| 81 | 6 | 8.467680   | -3.472788 | 0.000000 |
| 82 | 1 | 10.514050  | 2.730613  | 0.000000 |
| 83 | 1 | 8.731937   | 4.524280  | 0.000000 |
| 84 | 1 | 10.514049  | -2.730306 | 0.000000 |
| 85 | 1 | 8.732237   | -4.524154 | 0.000000 |
| 86 | 8 | 5.993692   | -3.917777 | 0.000000 |
| 87 | 6 | 2.494562   | -2.494569 | 0.000000 |
| 88 | 6 | 3.529468   | -3.529496 | 0.000000 |
| 89 | 6 | 1.713104   | -6.706256 | 0.000000 |
| 90 | 6 | 3.062455   | -7.124214 | 0.000000 |
| 91 | 6 | 3.083454   | -4.877683 | 0.000000 |

|     |    |           |            |          |
|-----|----|-----------|------------|----------|
| 92  | 6  | 1.726848  | -5.266406  | 0.000000 |
| 93  | 6  | 0.726464  | -4.258690  | 0.000000 |
| 94  | 6  | -0.726413 | -4.258726  | 0.000000 |
| 95  | 6  | -1.158139 | -2.936488  | 0.000000 |
| 96  | 6  | 1.158141  | -2.936477  | 0.000000 |
| 97  | 6  | -1.726920 | -5.266477  | 0.000000 |
| 98  | 6  | 0.718695  | -7.696739  | 0.000000 |
| 99  | 6  | -0.718577 | -7.696711  | 0.000000 |
| 100 | 6  | -1.713152 | -6.706224  | 0.000000 |
| 101 | 8  | -0.000010 | -2.062903  | 0.000000 |
| 102 | 8  | 3.917652  | -5.993716  | 0.000000 |
| 103 | 6  | 1.125957  | -9.049327  | 0.000000 |
| 104 | 6  | -1.125869 | -9.049319  | 0.000000 |
| 105 | 6  | -3.083596 | -4.877735  | 0.000000 |
| 106 | 8  | -3.917829 | -5.993752  | 0.000000 |
| 107 | 6  | -3.062539 | -7.124248  | 0.000000 |
| 108 | 6  | -3.529521 | -3.529445  | 0.000000 |
| 109 | 6  | -2.494562 | -2.494570  | 0.000000 |
| 110 | 6  | 2.471954  | -9.460761  | 0.000000 |
| 111 | 6  | 3.472940  | -8.467448  | 0.000000 |
| 112 | 6  | -3.472793 | -8.467697  | 0.000000 |
| 113 | 6  | -2.471681 | -9.460821  | 0.000000 |
| 114 | 1  | 2.730806  | -10.514060 | 0.000000 |
| 115 | 1  | 4.524286  | -8.732017  | 0.000000 |
| 116 | 1  | -4.524159 | -8.732322  | 0.000000 |
| 117 | 1  | -2.730495 | -10.514061 | 0.000000 |
| 118 | 8  | -0.000001 | -9.897948  | 0.000000 |
| 119 | 6  | 3.083596  | 4.877735   | 0.000000 |
| 120 | 8  | -3.917652 | 5.993716   | 0.000000 |
| 121 | 78 | 0.000000  | 0.000000   | 0.000000 |

**Table S8.** The optimized Cartesian coordinates of the complex **5** in the exited triplet state calculated at the B3LYP/LanL2Dz level of theory

| Center Number | Atomic Number | Coordinates (Angstroms) |           |          |
|---------------|---------------|-------------------------|-----------|----------|
|               |               | X                       | Y         | Z        |
| 1             | 6             | 1.735499                | 5.291282  | 0.000000 |
| 2             | 6             | 3.093202                | 4.893183  | 0.000000 |
| 3             | 6             | 3.070348                | 7.144559  | 0.000000 |
| 4             | 6             | 1.721668                | 6.726027  | 0.000000 |
| 5             | 6             | 0.717722                | 7.713515  | 0.000000 |
| 6             | 6             | -0.717790               | 7.713547  | 0.000000 |
| 7             | 6             | -1.125677               | 9.071567  | 0.000000 |
| 8             | 6             | 1.125717                | 9.071597  | 0.000000 |
| 9             | 6             | -1.721614               | 6.726133  | 0.000000 |
| 10            | 6             | 0.727903                | 4.296411  | 0.000000 |
| 11            | 6             | -0.728072               | 4.296435  | 0.000000 |
| 12            | 6             | -1.735533               | 5.291366  | 0.000000 |
| 13            | 8             | -0.000001               | 9.919611  | 0.000000 |
| 14            | 6             | 1.151443                | 2.965601  | 0.000000 |
| 15            | 6             | -1.151472               | 2.965611  | 0.000000 |
| 16            | 6             | -3.070253               | 7.144621  | 0.000000 |
| 17            | 8             | -3.926278               | 6.014617  | 0.000000 |
| 18            | 6             | 2.467849                | 9.482989  | 0.000000 |
| 19            | 6             | 3.474443                | 8.488826  | 0.000000 |
| 20            | 6             | -3.474286               | 8.488848  | 0.000000 |
| 21            | 6             | -2.467711               | 9.482969  | 0.000000 |
| 22            | 1             | 2.726341                | 10.536215 | 0.000000 |
| 23            | 1             | 4.524579                | 8.759086  | 0.000000 |

|    |   |            |           |          |
|----|---|------------|-----------|----------|
| 24 | 1 | -4.524374  | 8.759162  | 0.000000 |
| 25 | 1 | -2.726188  | 10.536166 | 0.000000 |
| 26 | 8 | 0.000004   | 2.138121  | 0.000000 |
| 27 | 6 | 3.538343   | 3.537784  | 0.000000 |
| 28 | 6 | 2.501091   | 2.500643  | 0.000000 |
| 29 | 6 | 4.297190   | -0.727892 | 0.000000 |
| 30 | 6 | 2.965959   | -1.151485 | 0.000000 |
| 31 | 6 | 2.965983   | 1.151502  | 0.000000 |
| 32 | 6 | 4.297184   | 0.727983  | 0.000000 |
| 33 | 6 | 5.292004   | 1.735354  | 0.000000 |
| 34 | 6 | 6.727236   | 1.721621  | 0.000000 |
| 35 | 6 | 7.145322   | 3.070277  | 0.000000 |
| 36 | 6 | 4.894027   | 3.092725  | 0.000000 |
| 37 | 6 | 7.714510   | 0.718107  | 0.000000 |
| 38 | 6 | 5.292034   | -1.735400 | 0.000000 |
| 39 | 6 | 6.727229   | -1.721598 | 0.000000 |
| 40 | 6 | 7.714514   | -0.717966 | 0.000000 |
| 41 | 8 | 6.014932   | 3.926160  | 0.000000 |
| 42 | 8 | 2.138687   | 0.000047  | 0.000000 |
| 43 | 6 | 4.894057   | -3.092853 | 0.000000 |
| 44 | 6 | 7.145358   | -3.070267 | 0.000000 |
| 45 | 6 | 9.072288   | 1.125840  | 0.000000 |
| 46 | 8 | 9.920308   | 0.000052  | 0.000000 |
| 47 | 6 | 9.072288   | -1.125777 | 0.000000 |
| 48 | 6 | 9.483453   | 2.468122  | 0.000000 |
| 49 | 6 | 8.489546   | 3.474455  | 0.000000 |
| 50 | 6 | 9.483468   | -2.468079 | 0.000000 |
| 51 | 6 | 8.489549   | -3.474413 | 0.000000 |
| 52 | 1 | 10.536563  | 2.726616  | 0.000000 |
| 53 | 1 | 8.759677   | 4.524543  | 0.000000 |
| 54 | 1 | 10.536582  | -2.726564 | 0.000000 |
| 55 | 1 | 8.759758   | -4.524469 | 0.000000 |
| 56 | 8 | 6.015011   | -3.926113 | 0.000000 |
| 57 | 6 | -4.297184  | -0.727983 | 0.000000 |
| 58 | 6 | -2.965983  | -1.151502 | 0.000000 |
| 59 | 6 | -2.965959  | 1.151485  | 0.000000 |
| 60 | 6 | -4.297190  | 0.727892  | 0.000000 |
| 61 | 6 | -5.292034  | 1.735400  | 0.000000 |
| 62 | 6 | -6.727229  | 1.721598  | 0.000000 |
| 63 | 6 | -7.145358  | 3.070267  | 0.000000 |
| 64 | 6 | -4.894057  | 3.092853  | 0.000000 |
| 65 | 6 | -7.714514  | 0.717966  | 0.000000 |
| 66 | 6 | -5.292004  | -1.735354 | 0.000000 |
| 67 | 6 | -6.727236  | -1.721621 | 0.000000 |
| 68 | 6 | -7.714510  | -0.718107 | 0.000000 |
| 69 | 8 | -6.015011  | 3.926113  | 0.000000 |
| 70 | 8 | -2.138687  | -0.000047 | 0.000000 |
| 71 | 6 | -4.894027  | -3.092725 | 0.000000 |
| 72 | 6 | -7.145322  | -3.070277 | 0.000000 |
| 73 | 6 | -9.072288  | 1.125777  | 0.000000 |
| 74 | 8 | -9.920308  | -0.000052 | 0.000000 |
| 75 | 6 | -9.072288  | -1.125840 | 0.000000 |
| 76 | 6 | -3.538317  | 3.537881  | 0.000000 |
| 77 | 6 | -2.501090  | 2.500677  | 0.000000 |
| 78 | 6 | -9.483468  | 2.468079  | 0.000000 |
| 79 | 6 | -8.489549  | 3.474413  | 0.000000 |
| 80 | 6 | -9.483453  | -2.468122 | 0.000000 |
| 81 | 6 | -8.489546  | -3.474455 | 0.000000 |
| 82 | 1 | -10.536582 | 2.726564  | 0.000000 |
| 83 | 1 | -8.759758  | 4.524469  | 0.000000 |
| 84 | 1 | -10.536563 | -2.726616 | 0.000000 |
| 85 | 1 | -8.759677  | -4.524543 | 0.000000 |
| 86 | 8 | -6.014932  | -3.926160 | 0.000000 |

|     |    |           |            |          |
|-----|----|-----------|------------|----------|
| 87  | 6  | -2.501091 | -2.500643  | 0.000000 |
| 88  | 6  | -3.538343 | -3.537784  | 0.000000 |
| 89  | 6  | -1.721668 | -6.726027  | 0.000000 |
| 90  | 6  | -3.070348 | -7.144559  | 0.000000 |
| 91  | 6  | -3.093202 | -4.893183  | 0.000000 |
| 92  | 6  | -1.735499 | -5.291282  | 0.000000 |
| 93  | 6  | -0.727903 | -4.296411  | 0.000000 |
| 94  | 6  | 0.728072  | -4.296435  | 0.000000 |
| 95  | 6  | 1.151472  | -2.965611  | 0.000000 |
| 96  | 6  | -1.151443 | -2.965601  | 0.000000 |
| 97  | 6  | 1.735533  | -5.291366  | 0.000000 |
| 98  | 6  | -0.717722 | -7.713515  | 0.000000 |
| 99  | 6  | 0.717790  | -7.713547  | 0.000000 |
| 100 | 6  | 1.721614  | -6.726133  | 0.000000 |
| 101 | 8  | -0.000004 | -2.138121  | 0.000000 |
| 102 | 8  | -3.926362 | -6.014498  | 0.000000 |
| 103 | 6  | -1.125717 | -9.071597  | 0.000000 |
| 104 | 6  | 1.125677  | -9.071567  | 0.000000 |
| 105 | 6  | 3.093219  | -4.893318  | 0.000000 |
| 106 | 8  | 3.926278  | -6.014617  | 0.000000 |
| 107 | 6  | 3.070253  | -7.144621  | 0.000000 |
| 108 | 6  | 3.538317  | -3.537881  | 0.000000 |
| 109 | 6  | 2.501090  | -2.500677  | 0.000000 |
| 110 | 6  | -2.467849 | -9.482989  | 0.000000 |
| 111 | 6  | -3.474443 | -8.488826  | 0.000000 |
| 112 | 6  | 3.474286  | -8.488848  | 0.000000 |
| 113 | 6  | 2.467711  | -9.482969  | 0.000000 |
| 114 | 1  | -2.726341 | -10.536215 | 0.000000 |
| 115 | 1  | -4.524579 | -8.759086  | 0.000000 |
| 116 | 1  | 4.524374  | -8.759162  | 0.000000 |
| 117 | 1  | 2.726188  | -10.536166 | 0.000000 |
| 118 | 8  | 0.000001  | -9.919611  | 0.000000 |
| 119 | 6  | -3.093219 | 4.893318   | 0.000000 |
| 120 | 8  | 3.926362  | 6.014498   | 0.000000 |
| 121 | 78 | 0.000000  | 0.000000   | 0.000000 |

**Table S9.** The optimized Cartesian coordinates of the complex **6** in the ground singlet state calculated at the B3LYP/LanL2Dz level of theory

| Center Number | Atomic Number | Coordinates (Angstroms) |          |          |
|---------------|---------------|-------------------------|----------|----------|
|               |               | X                       | Y        | Z        |
| 1             | 48            | 0.000000                | 0.000000 | 0.000000 |
| 2             | 6             | -1.717942               | 5.245171 | 1.982498 |
| 3             | 6             | -3.068357               | 4.853036 | 1.989326 |
| 4             | 6             | -3.057434               | 7.083778 | 2.251531 |
| 5             | 6             | -1.708196               | 6.676445 | 2.158946 |
| 6             | 6             | -0.718738               | 7.665157 | 2.266123 |
| 7             | 6             | 0.718738                | 7.665157 | 2.266123 |
| 8             | 6             | 1.126764                | 9.004678 | 2.452178 |
| 9             | 6             | -1.126764               | 9.004678 | 2.452178 |
| 10            | 6             | 1.708196                | 6.676445 | 2.158946 |
| 11            | 6             | -0.723555               | 4.243798 | 1.830323 |
| 12            | 6             | 0.723555                | 4.243798 | 1.830323 |
| 13            | 6             | 1.717942                | 5.245171 | 1.982498 |
| 14            | 8             | 0.000000                | 9.847935 | 2.560596 |
| 15            | 6             | -1.136999               | 2.919712 | 1.669359 |
| 16            | 6             | 1.136999                | 2.919712 | 1.669359 |
| 17            | 6             | 3.057434                | 7.083778 | 2.251531 |

|    |   |            |           |          |
|----|---|------------|-----------|----------|
| 18 | 8 | 3.909643   | 5.959067  | 2.147675 |
| 19 | 6 | -2.471825  | 9.406632  | 2.534890 |
| 20 | 6 | -3.469387  | 8.414358  | 2.432846 |
| 21 | 6 | 3.469387   | 8.414358  | 2.432846 |
| 22 | 6 | 2.471825   | 9.406632  | 2.534890 |
| 23 | 1 | -2.732941  | 10.448519 | 2.684180 |
| 24 | 1 | -4.521256  | 8.668121  | 2.501399 |
| 25 | 1 | 4.521256   | 8.668121  | 2.501399 |
| 26 | 1 | 2.732941   | 10.448519 | 2.684180 |
| 27 | 8 | 0.000000   | 2.057771  | 1.512104 |
| 28 | 6 | -3.507121  | 3.507121  | 1.888706 |
| 29 | 6 | -2.480104  | 2.480104  | 1.716719 |
| 30 | 6 | -4.243798  | -0.723555 | 1.830323 |
| 31 | 6 | -2.919712  | -1.136999 | 1.669359 |
| 32 | 6 | -2.919712  | 1.136999  | 1.669359 |
| 33 | 6 | -4.243798  | 0.723555  | 1.830323 |
| 34 | 6 | -5.245171  | 1.717942  | 1.982498 |
| 35 | 6 | -6.676445  | 1.708196  | 2.158946 |
| 36 | 6 | -7.083778  | 3.057434  | 2.251531 |
| 37 | 6 | -4.853036  | 3.068357  | 1.989326 |
| 38 | 6 | -7.665157  | 0.718738  | 2.266123 |
| 39 | 6 | -5.245171  | -1.717942 | 1.982498 |
| 40 | 6 | -6.676445  | -1.708196 | 2.158946 |
| 41 | 6 | -7.665157  | -0.718738 | 2.266123 |
| 42 | 8 | -5.959067  | 3.909643  | 2.147675 |
| 43 | 8 | -2.057771  | 0.000000  | 1.512104 |
| 44 | 6 | -4.853036  | -3.068357 | 1.989326 |
| 45 | 6 | -7.083778  | -3.057434 | 2.251531 |
| 46 | 6 | -9.004678  | 1.126764  | 2.452178 |
| 47 | 8 | -9.847935  | 0.000000  | 2.560596 |
| 48 | 6 | -9.004678  | -1.126764 | 2.452178 |
| 49 | 6 | -9.406632  | 2.471825  | 2.534890 |
| 50 | 6 | -8.414358  | 3.469387  | 2.432846 |
| 51 | 6 | -9.406632  | -2.471825 | 2.534890 |
| 52 | 6 | -8.414358  | -3.469387 | 2.432846 |
| 53 | 1 | -10.448519 | 2.732941  | 2.684180 |
| 54 | 1 | -8.668121  | 4.521256  | 2.501399 |
| 55 | 1 | -10.448519 | -2.732941 | 2.684180 |
| 56 | 1 | -8.668121  | -4.521256 | 2.501399 |
| 57 | 8 | -5.959067  | -3.909643 | 2.147675 |
| 58 | 6 | 4.243798   | -0.723555 | 1.830323 |
| 59 | 6 | 2.919712   | -1.136999 | 1.669359 |
| 60 | 6 | 2.919712   | 1.136999  | 1.669359 |
| 61 | 6 | 4.243798   | 0.723555  | 1.830323 |
| 62 | 6 | 5.245171   | 1.717942  | 1.982498 |
| 63 | 6 | 6.676445   | 1.708196  | 2.158946 |
| 64 | 6 | 7.083778   | 3.057434  | 2.251531 |
| 65 | 6 | 4.853036   | 3.068357  | 1.989326 |
| 66 | 6 | 7.665157   | 0.718738  | 2.266123 |
| 67 | 6 | 5.245171   | -1.717942 | 1.982498 |
| 68 | 6 | 6.676445   | -1.708196 | 2.158946 |
| 69 | 6 | 7.665157   | -0.718738 | 2.266123 |
| 70 | 8 | 5.959067   | 3.909643  | 2.147675 |
| 71 | 8 | 2.057771   | 0.000000  | 1.512104 |
| 72 | 6 | 4.853036   | -3.068357 | 1.989326 |
| 73 | 6 | 7.083778   | -3.057434 | 2.251531 |
| 74 | 6 | 9.004678   | 1.126764  | 2.452178 |
| 75 | 8 | 9.847935   | 0.000000  | 2.560596 |
| 76 | 6 | 9.004678   | -1.126764 | 2.452178 |
| 77 | 6 | 3.507121   | 3.507121  | 1.888706 |
| 78 | 6 | 2.480104   | 2.480104  | 1.716719 |
| 79 | 6 | 9.406632   | 2.471825  | 2.534890 |
| 80 | 6 | 8.414358   | 3.469387  | 2.432846 |



|     |   |           |            |           |
|-----|---|-----------|------------|-----------|
| 81  | 6 | 9.406632  | -2.471825  | 2.534890  |
| 82  | 6 | 8.414358  | -3.469387  | 2.432846  |
| 83  | 1 | 10.448519 | 2.732941   | 2.684180  |
| 84  | 1 | 8.668121  | 4.521256   | 2.501399  |
| 85  | 1 | 10.448519 | -2.732941  | 2.684180  |
| 86  | 1 | 8.668121  | -4.521256  | 2.501399  |
| 87  | 8 | 5.959067  | -3.909643  | 2.147675  |
| 88  | 6 | 2.480104  | -2.480104  | 1.716719  |
| 89  | 6 | 3.507121  | -3.507121  | 1.888706  |
| 90  | 6 | 1.708196  | -6.676445  | 2.158946  |
| 91  | 6 | 3.057434  | -7.083778  | 2.251531  |
| 92  | 6 | 3.068357  | -4.853036  | 1.989326  |
| 93  | 6 | 1.717942  | -5.245171  | 1.982498  |
| 94  | 6 | 0.723555  | -4.243798  | 1.830323  |
| 95  | 6 | -0.723555 | -4.243798  | 1.830323  |
| 96  | 6 | -1.136999 | -2.919712  | 1.669359  |
| 97  | 6 | 1.136999  | -2.919712  | 1.669359  |
| 98  | 6 | -1.717942 | -5.245171  | 1.982498  |
| 99  | 6 | 0.718738  | -7.665157  | 2.266123  |
| 100 | 6 | -0.718738 | -7.665157  | 2.266123  |
| 101 | 6 | -1.708196 | -6.676445  | 2.158946  |
| 102 | 8 | 0.000000  | -2.057771  | 1.512104  |
| 103 | 8 | 3.909643  | -5.959067  | 2.147675  |
| 104 | 6 | 1.126764  | -9.004678  | 2.452178  |
| 105 | 6 | -1.126764 | -9.004678  | 2.452178  |
| 106 | 6 | -3.068357 | -4.853036  | 1.989326  |
| 107 | 8 | -3.909643 | -5.959067  | 2.147675  |
| 108 | 6 | -3.057434 | -7.083778  | 2.251531  |
| 109 | 6 | -3.507121 | -3.507121  | 1.888706  |
| 110 | 6 | -2.480104 | -2.480104  | 1.716719  |
| 111 | 6 | 2.471825  | -9.406632  | 2.534890  |
| 112 | 6 | 3.469387  | -8.414358  | 2.432846  |
| 113 | 6 | -3.469387 | -8.414358  | 2.432846  |
| 114 | 6 | -2.471825 | -9.406632  | 2.534890  |
| 115 | 1 | 2.732941  | -10.448519 | 2.684180  |
| 116 | 1 | 4.521256  | -8.668121  | 2.501399  |
| 117 | 1 | -4.521256 | -8.668121  | 2.501399  |
| 118 | 1 | -2.732941 | -10.448519 | 2.684180  |
| 119 | 8 | 0.000000  | -9.847935  | 2.560596  |
| 120 | 6 | 3.068357  | 4.853036   | 1.989326  |
| 121 | 8 | -3.909643 | 5.959067   | 2.147675  |
| 122 | 6 | -1.717942 | 5.245171   | -1.982498 |
| 123 | 6 | -3.068357 | 4.853036   | -1.989326 |
| 124 | 6 | -3.057434 | 7.083778   | -2.251531 |
| 125 | 6 | -1.708196 | 6.676445   | -2.158946 |
| 126 | 6 | -0.718738 | 7.665157   | -2.266123 |
| 127 | 6 | 0.718738  | 7.665157   | -2.266123 |
| 128 | 6 | 1.126764  | 9.004678   | -2.452178 |
| 129 | 6 | -1.126764 | 9.004678   | -2.452178 |
| 130 | 6 | 1.708196  | 6.676445   | -2.158946 |
| 131 | 6 | -0.723555 | 4.243798   | -1.830323 |
| 132 | 6 | 0.723555  | 4.243798   | -1.830323 |
| 133 | 6 | 1.717942  | 5.245171   | -1.982498 |
| 134 | 8 | 0.000000  | 9.847935   | -2.560596 |
| 135 | 6 | -1.136999 | 2.919712   | -1.669359 |
| 136 | 6 | 1.136999  | 2.919712   | -1.669359 |
| 137 | 6 | 3.057434  | 7.083778   | -2.251531 |
| 138 | 8 | 3.909643  | 5.959067   | -2.147675 |
| 139 | 6 | -2.471825 | 9.406632   | -2.534890 |
| 140 | 6 | -3.469387 | 8.414358   | -2.432846 |
| 141 | 6 | 3.469387  | 8.414358   | -2.432846 |
| 142 | 6 | 2.471825  | 9.406632   | -2.534890 |
| 143 | 1 | -2.732941 | 10.448519  | -2.684180 |

|     |   |            |           |           |
|-----|---|------------|-----------|-----------|
| 144 | 1 | -4.521256  | 8.668121  | -2.501399 |
| 145 | 1 | 4.521256   | 8.668121  | -2.501399 |
| 146 | 1 | 2.732941   | 10.448519 | -2.684180 |
| 147 | 8 | 0.000000   | 2.057771  | -1.512104 |
| 148 | 6 | -3.507121  | 3.507121  | -1.888706 |
| 149 | 6 | -2.480104  | 2.480104  | -1.716719 |
| 150 | 6 | -4.243798  | -0.723555 | -1.830323 |
| 151 | 6 | -2.919712  | -1.136999 | -1.669359 |
| 152 | 6 | -2.919712  | 1.136999  | -1.669359 |
| 153 | 6 | -4.243798  | 0.723555  | -1.830323 |
| 154 | 6 | -5.245171  | 1.717942  | -1.982498 |
| 155 | 6 | -6.676445  | 1.708196  | -2.158946 |
| 156 | 6 | -7.083778  | 3.057434  | -2.251531 |
| 157 | 6 | -4.853036  | 3.068357  | -1.989326 |
| 158 | 6 | -7.665157  | 0.718738  | -2.266123 |
| 159 | 6 | -5.245171  | -1.717942 | -1.982498 |
| 160 | 6 | -6.676445  | -1.708196 | -2.158946 |
| 161 | 6 | -7.665157  | -0.718738 | -2.266123 |
| 162 | 8 | -5.959067  | 3.909643  | -2.147675 |
| 163 | 8 | -2.057771  | 0.000000  | -1.512104 |
| 164 | 6 | -4.853036  | -3.068357 | -1.989326 |
| 165 | 6 | -7.083778  | -3.057434 | -2.251531 |
| 166 | 6 | -9.004678  | 1.126764  | -2.452178 |
| 167 | 8 | -9.847935  | 0.000000  | -2.560596 |
| 168 | 6 | -9.004678  | -1.126764 | -2.452178 |
| 169 | 6 | -9.406632  | 2.471825  | -2.534890 |
| 170 | 6 | -8.414358  | 3.469387  | -2.432846 |
| 171 | 6 | -9.406632  | -2.471825 | -2.534890 |
| 172 | 6 | -8.414358  | -3.469387 | -2.432846 |
| 173 | 1 | -10.448519 | 2.732941  | -2.684180 |
| 174 | 1 | -8.668121  | 4.521256  | -2.501399 |
| 175 | 1 | -10.448519 | -2.732941 | -2.684180 |
| 176 | 1 | -8.668121  | -4.521256 | -2.501399 |
| 177 | 8 | -5.959067  | -3.909643 | -2.147675 |
| 178 | 6 | 4.243798   | -0.723555 | -1.830323 |
| 179 | 6 | 2.919712   | -1.136999 | -1.669359 |
| 180 | 6 | 2.919712   | 1.136999  | -1.669359 |
| 181 | 6 | 4.243798   | 0.723555  | -1.830323 |
| 182 | 6 | 5.245171   | 1.717942  | -1.982498 |
| 183 | 6 | 6.676445   | 1.708196  | -2.158946 |
| 184 | 6 | 7.083778   | 3.057434  | -2.251531 |
| 185 | 6 | 4.853036   | 3.068357  | -1.989326 |
| 186 | 6 | 7.665157   | 0.718738  | -2.266123 |
| 187 | 6 | 5.245171   | -1.717942 | -1.982498 |
| 188 | 6 | 6.676445   | -1.708196 | -2.158946 |
| 189 | 6 | 7.665157   | -0.718738 | -2.266123 |
| 190 | 8 | 5.959067   | 3.909643  | -2.147675 |
| 191 | 8 | 2.057771   | 0.000000  | -1.512104 |
| 192 | 6 | 4.853036   | -3.068357 | -1.989326 |
| 193 | 6 | 7.083778   | -3.057434 | -2.251531 |
| 194 | 6 | 9.004678   | 1.126764  | -2.452178 |
| 195 | 8 | 9.847935   | 0.000000  | -2.560596 |
| 196 | 6 | 9.004678   | -1.126764 | -2.452178 |
| 197 | 6 | 3.507121   | 3.507121  | -1.888706 |
| 198 | 6 | 2.480104   | 2.480104  | -1.716719 |
| 199 | 6 | 9.406632   | 2.471825  | -2.534890 |
| 200 | 6 | 8.414358   | 3.469387  | -2.432846 |
| 201 | 6 | 9.406632   | -2.471825 | -2.534890 |
| 202 | 6 | 8.414358   | -3.469387 | -2.432846 |
| 203 | 1 | 10.448519  | 2.732941  | -2.684180 |
| 204 | 1 | 8.668121   | 4.521256  | -2.501399 |
| 205 | 1 | 10.448519  | -2.732941 | -2.684180 |
| 206 | 1 | 8.668121   | -4.521256 | -2.501399 |

|     |   |           |            |           |
|-----|---|-----------|------------|-----------|
| 207 | 8 | 5.959067  | -3.909643  | -2.147675 |
| 208 | 6 | 2.480104  | -2.480104  | -1.716719 |
| 209 | 6 | 3.507121  | -3.507121  | -1.888706 |
| 210 | 6 | 1.708196  | -6.676445  | -2.158946 |
| 211 | 6 | 3.057434  | -7.083778  | -2.251531 |
| 212 | 6 | 3.068357  | -4.853036  | -1.989326 |
| 213 | 6 | 1.717942  | -5.245171  | -1.982498 |
| 214 | 6 | 0.723555  | -4.243798  | -1.830323 |
| 215 | 6 | -0.723555 | -4.243798  | -1.830323 |
| 216 | 6 | -1.136999 | -2.919712  | -1.669359 |
| 217 | 6 | 1.136999  | -2.919712  | -1.669359 |
| 218 | 6 | -1.717942 | -5.245171  | -1.982498 |
| 219 | 6 | 0.718738  | -7.665157  | -2.266123 |
| 220 | 6 | -0.718738 | -7.665157  | -2.266123 |
| 221 | 6 | -1.708196 | -6.676445  | -2.158946 |
| 222 | 8 | 0.000000  | -2.057771  | -1.512104 |
| 223 | 8 | 3.909643  | -5.959067  | -2.147675 |
| 224 | 6 | 1.126764  | -9.004678  | -2.452178 |
| 225 | 6 | -1.126764 | -9.004678  | -2.452178 |
| 226 | 6 | -3.068357 | -4.853036  | -1.989326 |
| 227 | 8 | -3.909643 | -5.959067  | -2.147675 |
| 228 | 6 | -3.057434 | -7.083778  | -2.251531 |
| 229 | 6 | -3.507121 | -3.507121  | -1.888706 |
| 230 | 6 | -2.480104 | -2.480104  | -1.716719 |
| 231 | 6 | 2.471825  | -9.406632  | -2.534890 |
| 232 | 6 | 3.469387  | -8.414358  | -2.432846 |
| 233 | 6 | -3.469387 | -8.414358  | -2.432846 |
| 234 | 6 | -2.471825 | -9.406632  | -2.534890 |
| 235 | 1 | 2.732941  | -10.448519 | -2.684180 |
| 236 | 1 | 4.521256  | -8.668121  | -2.501399 |
| 237 | 1 | -4.521256 | -8.668121  | -2.501399 |
| 238 | 1 | -2.732941 | -10.448519 | -2.684180 |
| 239 | 8 | 0.000000  | -9.847935  | -2.560596 |
| 240 | 6 | 3.068357  | 4.853036   | -1.989326 |
| 241 | 8 | -3.909643 | 5.959067   | -2.147675 |

---
